# Supplementary material for: Phylogenomic and functional analyses of salmon lice aquaporins uncover the molecular diversity of the superfamily in Arthropoda
Source: Springer Nature journal article supplement (doi:10.1186/s12864-015-1814-8), 2015-08-17
Supplement: MOESM1 [file 12864_2015_1814_MOESM1_ESM.pdf]

1 Supplementary data for

2 **Phylogenomic and functional analyses of salmon lice aquaporins uncover**  
3 **the molecular diversity of the superfamily in Arthropoda**

4 by

5 Jon Anders Stavang <sup>1</sup> (jon.stavang@uib.no), Francois Chauvigné <sup>1,3</sup>

6 <sup>\*</sup>(francois.chauvigne@uib.no), Heidi Kongshaug <sup>1</sup>(heidi.kongshaug@uib.no), Joan Cerdà <sup>3</sup>

7 (joan.cerda@irta.cat), Frank Nilsen <sup>1</sup> (frank.nilsen@uib.no), Roderick Nigel Finn <sup>1,2\*</sup>

8 (nigel.finn@uib.no)

9

10 **Supplemental information**

11 **Additional file 1**

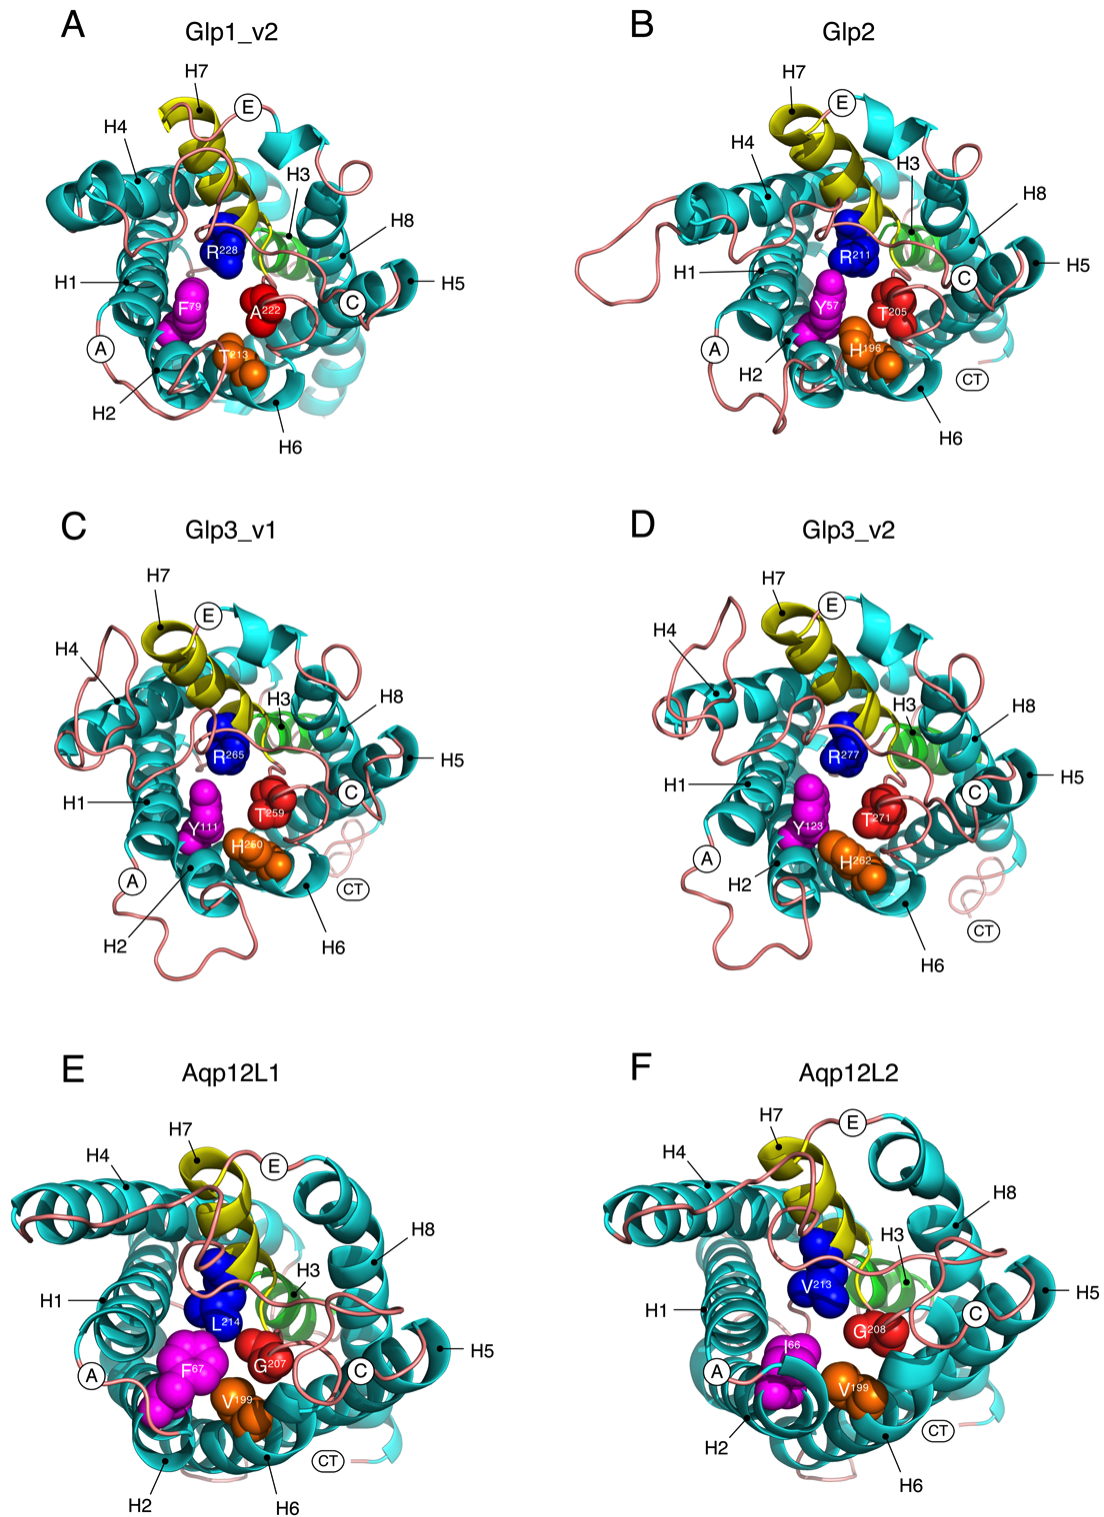

12

13 **Figure S1.** Extracellular views of cartoon renders of salmon louse aquaporins illustrating the ar/R  
14 constriction residues (spacefill) that determine the molecular selectivity of the channel. Labels are  
15 annotated as for Figure 1 in the main text.



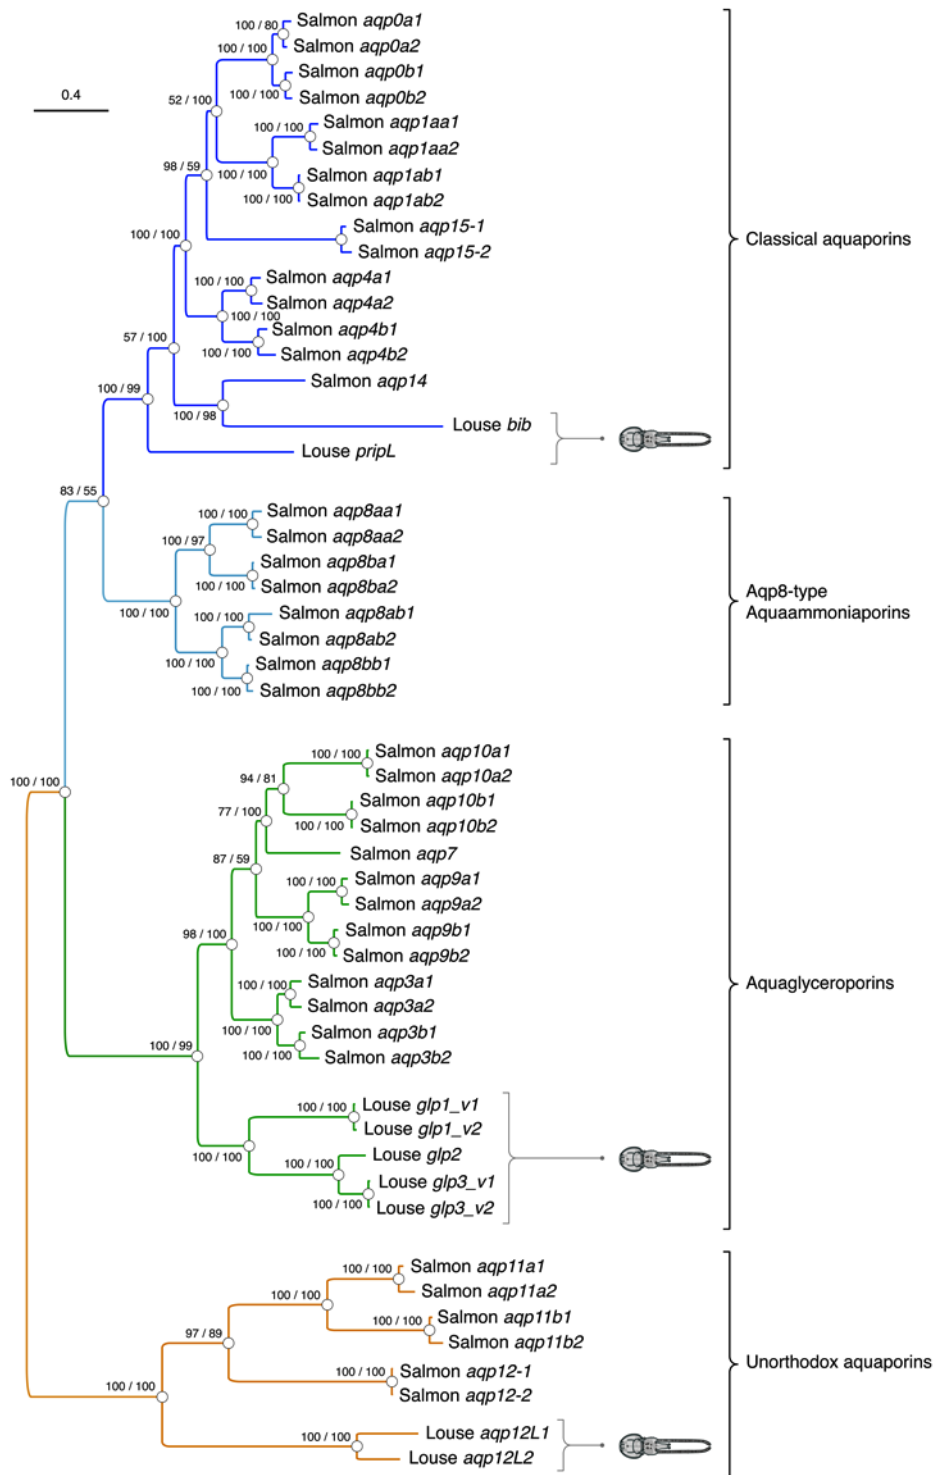

21

22 **Figure S3.** Bayesian majority-rule mid-point rooted tree of a codon alignment of the aquaporin  
 23 superfamilies in the Atlantic salmon and salmon louse. The tree was inferred from 1 million MCMC  
 24 generations on 57,075 nucleotide sites. Posterior probabilities of the codon/amino acid analyses are  
 25 shown at each node. Scale bar represents the number of nucleotide substitutions per site.

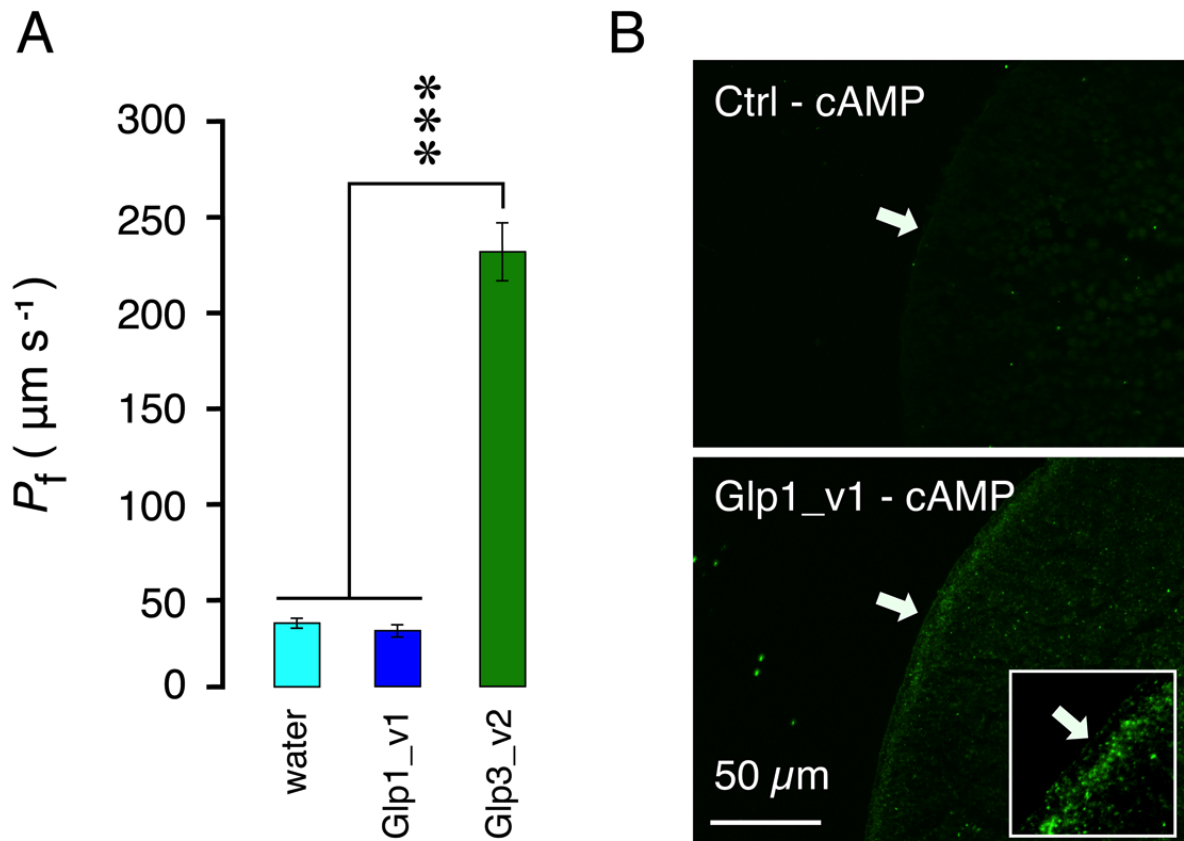

26

27 **Figure S4.** In the absence of cAMP, salmon louse Glp1\_v1 is non functional in *X. laevis* oocytes. (A)  
 28 Osmotic water permeability ( $P_f$ ) of Glp1\_v1 without the addition of cAMP compared to water- and  
 29 *glp\_3v2*-injected oocytes as negative and positive controls, respectively. (B) Immunofluorescence  
 30 micrographs of paraffin sections of water- (Ctrl) and *glp1\_v1*-injected oocytes in the absence of cAMP  
 31 probed with paralog-specific antisera followed by Cy3-labeled anti-rabbit IgG. Arrows point to the  
 32 plasma membrane. Inset: Magnified region shows the retention of Glp1\_v1 (green) just below the  
 33 oocyte plasma membrane.

34  
35  
36  
37

**Table S1: C-terminal peptides used to immunize rabbits to raise salmon louse affinity-purified antibodies**

| Paralog    | Antigen                                                   |
|------------|-----------------------------------------------------------|
| Bib-Ct     | (NH <sub>2</sub> -) CSRHRGDFYSPSYNA (-CONH <sub>2</sub> ) |
| PripL-Ct   | (NH <sub>2</sub> -) CRPSHSLAEEYGIVRT (-COOH)              |
| Glp1-Ct    | (NH <sub>2</sub> -) CSLEDQRTPNLMNL (-COOH)                |
| Glp3-Ct    | (NH <sub>2</sub> -) C(Ahx)IELHHPIDE (-COOH)               |
| Aqp12L1-Ct | (NH <sub>2</sub> -) CVFNYTTKAKEE (-COOH)                  |
| Aqp12L2-Ct | (NH <sub>2</sub> -) CLSDFNSKSKSVN (-COOH)                 |

38  
39  
40  
41  
42  
43

**Table S2. List of aquaporin accession numbers used in the study** (see following pages)

**Table S3: Oligonucleotide primers used for RT-PCR analysis.** Nucleic acid sequences for primers specific for each salmon louse aquaporin mRNA, *efl* $\alpha$  and expected product size.

| Gene                | Forward                   | Reverse                 | Expected Product size |
|---------------------|---------------------------|-------------------------|-----------------------|
| <i>bib</i>          | CGCAATCCTCCTTATCCAGA      | ATTTGCTCCCAAGTTCTCCA    | 112                   |
| <i>pripL</i>        | CCATTGGCCATTGGATTAGC      | AATAACAGCCGGTCCAAATG    | 102                   |
| <i>glp1_v1</i>      | AAGCGAAAGAAGAGTAACTTAGTG  | ACCCATATGATTGTCAAACAGC  | 112                   |
| <i>glp1_v2</i>      | TCCCTCGTCATTCTAGCTTTC     | GTATATGGTCCGTCAATGGATG  | 106                   |
| <i>glp2</i>         | AACCTTATCACTCACGACTAAC    | CAAGGATGGTCATTCTCGAATTG | 115                   |
| <i>glp3_v1</i>      | AGATTGAAGTGGGAAACATGTC    | CAAGGATGGTCATTCTCGAATTG | 100                   |
| <i>glp3_v2</i>      | ACTTTGCTCCACGATTATTCAC    | CAAGAACTCCACCCACATGA    | 114                   |
| <i>aqp12L1</i>      | GAGAAACCAGTGAAAGGATTATTG  | GGTCATCATGATGCCTTCTG    | 136                   |
| <i>aqp12L2</i>      | ACATTCAGAAGGAGAAGGACAA    | ACTTTAGGAACACTGGTCATCAT | 117                   |
| <i>efl</i> $\alpha$ | CATCGCCTGCAAGTTTAACCAAATT | CCGGCATCACCAGACTTGA     | 117                   |

44

Additional file: Table S2: Accession numbers of sequences analysed in the study

| Accession #                                                     | ortholog | Animal                     | Species                               | Rank                | Order         | Family          |
|-----------------------------------------------------------------|----------|----------------------------|---------------------------------------|---------------------|---------------|-----------------|
| <b>Atlantic salmon paralogs</b>                                 |          |                            |                                       |                     |               |                 |
| KM677197                                                        | AQP 0a1  | Atlantic salmon            | <i>Salmo salar</i>                    | Protacanthopterygii | Salmoniformes | Salmonidae      |
| KM677198                                                        | AQP 0a2  | Atlantic salmon            | <i>Salmo salar</i>                    | Protacanthopterygii | Salmoniformes | Salmonidae      |
| KM677199                                                        | AQP 0b1  | Atlantic salmon            | <i>Salmo salar</i>                    | Protacanthopterygii | Salmoniformes | Salmonidae      |
| KM677200                                                        | AQP 0b2  | Atlantic salmon            | <i>Salmo salar</i>                    | Protacanthopterygii | Salmoniformes | Salmonidae      |
| AGKD01005533/ACI66426                                           | AQP 1aa1 | Atlantic salmon            | <i>Salmo salar</i>                    | Protacanthopterygii | Salmoniformes | Salmonidae      |
| AGKD01009244/ACI67627                                           | AQP 1aa2 | Atlantic salmon            | <i>Salmo salar</i>                    | Protacanthopterygii | Salmoniformes | Salmonidae      |
| AGKD01338342                                                    | AQP 1ab1 | Atlantic salmon            | <i>Salmo salar</i>                    | Protacanthopterygii | Salmoniformes | Salmonidae      |
| ACI33306/NP_001133472/AGKD01009244                              | AQP 1ab2 | Atlantic salmon            | <i>Salmo salar</i>                    | Protacanthopterygii | Salmoniformes | Salmonidae      |
| AGKD01027288                                                    | AQP 15-1 | Atlantic salmon            | <i>Salmo salar</i>                    | Protacanthopterygii | Salmoniformes | Salmonidae      |
| AGKD01030871/AGKD01079866                                       | AQP 15-2 | Atlantic salmon            | <i>Salmo salar</i>                    | Protacanthopterygii | Salmoniformes | Salmonidae      |
| AGKD01106121                                                    | AQP 4a1  | Atlantic salmon            | <i>Salmo salar</i>                    | Protacanthopterygii | Salmoniformes | Salmonidae      |
| AGKD01009294                                                    | AQP 4a2  | Atlantic salmon            | <i>Salmo salar</i>                    | Protacanthopterygii | Salmoniformes | Salmonidae      |
| AGKD01074371                                                    | AQP 4b1  | Atlantic salmon            | <i>Salmo salar</i>                    | Protacanthopterygii | Salmoniformes | Salmonidae      |
| AGKD01045191                                                    | AQP 4b2  | Atlantic salmon            | <i>Salmo salar</i>                    | Protacanthopterygii | Salmoniformes | Salmonidae      |
| AGKD01272622/AGKD01346587                                       | AQP 14-2 | Atlantic salmon            | <i>Salmo salar</i>                    | Protacanthopterygii | Salmoniformes | Salmonidae      |
| AGKD01005999/KC626878                                           | AQP 8aa1 | Atlantic salmon            | <i>Salmo salar</i>                    | Protacanthopterygii | Salmoniformes | Salmonidae      |
| AGKD01093852/AGKD01051269/DW573347                              | AQP 8aa2 | Atlantic salmon            | <i>Salmo salar</i>                    | Protacanthopterygii | Salmoniformes | Salmonidae      |
| AGKD01005999/DW532465                                           | AQP 8ab1 | Atlantic salmon            | <i>Salmo salar</i>                    | Protacanthopterygii | Salmoniformes | Salmonidae      |
| AGKD01051269/KC626879                                           | AQP 8ab2 | Atlantic salmon            | <i>Salmo salar</i>                    | Protacanthopterygii | Salmoniformes | Salmonidae      |
| AGKD01042454                                                    | AQP 8ba1 | Atlantic salmon            | <i>Salmo salar</i>                    | Protacanthopterygii | Salmoniformes | Salmonidae      |
| AGKD01119048/AGKD01190352                                       | AQP 8ba2 | Atlantic salmon            | <i>Salmo salar</i>                    | Protacanthopterygii | Salmoniformes | Salmonidae      |
| AGKD01119048/AGKD01156665/KC626880/ACN11279                     | AQP 8bb1 | Atlantic salmon            | <i>Salmo salar</i>                    | Protacanthopterygii | Salmoniformes | Salmonidae      |
| AGKD01042454                                                    | AQP 8bb2 | Atlantic salmon            | <i>Salmo salar</i>                    | Protacanthopterygii | Salmoniformes | Salmonidae      |
| AGKD01094322/AGKD01056897                                       | AQP 3a1  | Atlantic salmon            | <i>Salmo salar</i>                    | Protacanthopterygii | Salmoniformes | Salmonidae      |
| AGKD01068849/AGKD01149541                                       | AQP 3a2  | Atlantic salmon            | <i>Salmo salar</i>                    | Protacanthopterygii | Salmoniformes | Salmonidae      |
| AGKD01002624                                                    | AQP 3b1  | Atlantic salmon            | <i>Salmo salar</i>                    | Protacanthopterygii | Salmoniformes | Salmonidae      |
| AGKD01215587                                                    | AQP 3b2  | Atlantic salmon            | <i>Salmo salar</i>                    | Protacanthopterygii | Salmoniformes | Salmonidae      |
| AGKD01252585/AGKD01126390/AGKD01010521                          | AQP 9a1  | Atlantic salmon            | <i>Salmo salar</i>                    | Protacanthopterygii | Salmoniformes | Salmonidae      |
| AGKD0109773/AGKD01265939/AGKD01211321/AGKD01370165/AGKD01142451 | AQP 9a2  | Atlantic salmon            | <i>Salmo salar</i>                    | Protacanthopterygii | Salmoniformes | Salmonidae      |
| AGKD01025380/AGKD01043301                                       | AQP 9b1  | Atlantic salmon            | <i>Salmo salar</i>                    | Protacanthopterygii | Salmoniformes | Salmonidae      |
| AGKD01037951/AGKD01133133/AGKD01006400                          | AQP 9b2  | Atlantic salmon            | <i>Salmo salar</i>                    | Protacanthopterygii | Salmoniformes | Salmonidae      |
| AGKD01021376/AGKD01033103/AGKD01065234                          | AQP 7    | Atlantic salmon            | <i>Salmo salar</i>                    | Protacanthopterygii | Salmoniformes | Salmonidae      |
| AGKD01044249                                                    | AQP 10a1 | Atlantic salmon            | <i>Salmo salar</i>                    | Protacanthopterygii | Salmoniformes | Salmonidae      |
| AGKD01200314                                                    | AQP 10a2 | Atlantic salmon            | <i>Salmo salar</i>                    | Protacanthopterygii | Salmoniformes | Salmonidae      |
| AGKD01090696                                                    | AQP 10b1 | Atlantic salmon            | <i>Salmo salar</i>                    | Protacanthopterygii | Salmoniformes | Salmonidae      |
| AGKD01157343                                                    | AQP 10b2 | Atlantic salmon            | <i>Salmo salar</i>                    | Protacanthopterygii | Salmoniformes | Salmonidae      |
| EZ807701/EZ814810/CCAF010005608                                 | AQP 11a1 | Atlantic salmon            | <i>Salmo salar</i>                    | Protacanthopterygii | Salmoniformes | Salmonidae      |
| AGKD01029804                                                    | AQP 11a2 | Atlantic salmon            | <i>Salmo salar</i>                    | Protacanthopterygii | Salmoniformes | Salmonidae      |
| AGKD01193048                                                    | AQP 11b1 | Atlantic salmon            | <i>Salmo salar</i>                    | Protacanthopterygii | Salmoniformes | Salmonidae      |
| AGKD01088157                                                    | AQP 11b2 | Atlantic salmon            | <i>Salmo salar</i>                    | Protacanthopterygii | Salmoniformes | Salmonidae      |
| AGKD01402623                                                    | AQP 12-1 | Atlantic salmon            | <i>Salmo salar</i>                    | Protacanthopterygii | Salmoniformes | Salmonidae      |
| AGKD01127630                                                    | Aqp 12-2 | Atlantic salmon            | <i>Salmo salar</i>                    | Protacanthopterygii | Salmoniformes | Salmonidae      |
| <b>Arthropoda Bib</b>                                           |          |                            |                                       |                     |               |                 |
| FBpp0079519                                                     | Bib      | Fruit fly                  | <i>Drosophila melanogaster</i>        | Hexapoda            | Diptera       | Drosophilidae   |
| FBpp0222049                                                     | Bib      | Fruit fly                  | <i>Drosophila simulans</i>            | Hexapoda            | Diptera       | Drosophilidae   |
| FBpp0199328                                                     | Bib      | Fruit fly                  | <i>Drosophila sechellia</i>           | Hexapoda            | Diptera       | Drosophilidae   |
| FBpp0263898                                                     | Bib      | Fruit fly                  | <i>Drosophila yakuba</i>              | Hexapoda            | Diptera       | Drosophilidae   |
| FBpp0128621                                                     | Bib      | Fruit fly                  | <i>Drosophila erecta</i>              | Hexapoda            | Diptera       | Drosophilidae   |
| FBpp0118926                                                     | Bib      | Fruit fly                  | <i>Drosophila ananassae</i>           | Hexapoda            | Diptera       | Drosophilidae   |
| FBpp0280277                                                     | Bib      | Fruit fly                  | <i>Drosophila pseudoobscura</i>       | Hexapoda            | Diptera       | Drosophilidae   |
| FBpp0183059                                                     | Bib      | Fruit fly                  | <i>Drosophila persimilis</i>          | Hexapoda            | Diptera       | Drosophilidae   |
| ABL85281                                                        | Bib      | Fruit fly                  | <i>Drosophila americana</i>           | Hexapoda            | Diptera       | Drosophilidae   |
| FBpp0232341                                                     | Bib      | Fruit fly                  | <i>Drosophila virilis</i>             | Hexapoda            | Diptera       | Drosophilidae   |
| FBpp0166799                                                     | Bib      | Fruit fly                  | <i>Drosophila mojavensis</i>          | Hexapoda            | Diptera       | Drosophilidae   |
| FBpp0144970                                                     | Bib      | Fruit fly                  | <i>Drosophila grimshawi</i>           | Hexapoda            | Diptera       | Drosophilidae   |
| FBpp0244725/FBpp0241572                                         | Bib      | Fruit fly                  | <i>Drosophila willistoni</i>          | Hexapoda            | Diptera       | Drosophilidae   |
| AFP49901                                                        | Bib      | Tsetse fly                 | <i>Glossina morsitans morsitans</i>   | Hexapoda            | Diptera       | Glossinidae     |
| XP_004534536                                                    | Bib      | Mediterranean fruit fly    | <i>Ceratitis capitata</i>             | Hexapoda            | Diptera       | Tephritidae     |
| AAEL004741/XP_001649747                                         | Bib      | Yellow fever mosquito      | <i>Aedes aegypti</i>                  | Hexapoda            | Diptera       | Culicidae       |
| CPJ016447                                                       | Bib      | Southern house mosquito    | <i>Culex quinquefasciatus</i>         | Hexapoda            | Diptera       | Culicidae       |
| AGAP008766/AGAP008767                                           | Bib      | African malaria mosquito   | <i>Anopheles gambiae</i>              | Hexapoda            | Diptera       | Culicidae       |
| EFR20654/ETN57779                                               | Bib      | American malaria mosquito  | <i>Anopheles darlingi</i>             | Hexapoda            | Diptera       | Culicidae       |
| GAAK01005117/GAAK01001577                                       | Bib      | Antarctic flightless midge | <i>Belgica antarctica</i>             | Hexapoda            | Diptera       | Chironomidae    |
| KA181207                                                        | Bib      | Harlequin fly              | <i>Chironomus riparius</i>            | Hexapoda            | Diptera       | Chironomidae    |
| AADK01007500/BABH01027418/BABH01043412                          | Bib      | Domestic silkworm          | <i>Bombyx mori</i>                    | Hexapoda            | Lepidoptera   | Bombycidae      |
| CAE201006773                                                    | Bib      | Postman butterfly          | <i>Heliconius melpomene melpomene</i> | Hexapoda            | Lepidoptera   | Nymphalidae     |
| EHJ64738/EHJ63154                                               | Bib      | Monarch butterfly          | <i>Danaus plexippus</i>               | Hexapoda            | Lepidoptera   | Nymphalidae     |
| AIXA01000727/AIXA01000726/AIXA01003168                          | Bib      | Tobacco hornworm           | <i>Manduca sexta</i>                  | Hexapoda            | Lepidoptera   | Sphingidae      |
| TC010832                                                        | Bib      | Red flour Beetle           | <i>Tribolium castaneum</i>            | Hexapoda            | Coleoptera    | Tenebrionidae   |
| JU421678                                                        | Bib      | Salt marsh beetle          | <i>Pogonus chaldeus</i>               | Hexapoda            | Coleoptera    | Carabidae       |
| JR479665                                                        | Bib      | Red palm weevil            | <i>Rhynchophorus ferrugineus</i>      | Hexapoda            | Coleoptera    | Curculionidae   |
| ENN74136                                                        | Bib      | Mountain pine beetle       | <i>Dendroctonus ponderosae</i>        | Hexapoda            | Coleoptera    | Curculionidae   |
| XP_003399074                                                    | Bib      | Buff-tailed bumblebee      | <i>Bombus terrestris</i>              | Hexapoda            | Hymenoptera   | Apidae          |
| XP_003487862                                                    | Bib      | Common eastern bumble bee  | <i>Bombus impatiens</i>               | Hexapoda            | Hymenoptera   | Apidae          |
| XP_396705                                                       | Bib      | Honey bee                  | <i>Apis mellifera</i>                 | Hexapoda            | Hymenoptera   | Apidae          |
| XP_003699287                                                    | Bib      | Alfalfa leafcutting bee    | <i>Megachile rotundata</i>            | Hexapoda            | Hymenoptera   | Megachilidae    |
| EFZ15059                                                        | Bib      | Red fire ant               | <i>Solenopsis invicta</i>             | Hexapoda            | Hymenoptera   | Formicidae      |
| AEAB01004397                                                    | Bib      | Florida carpenter ant      | <i>Camponotus floridanus</i>          | Hexapoda            | Hymenoptera   | Formicidae      |
| EFN86731/EFN86732                                               | Bib      | Jerdon's jumping ant       | <i>Harpegnathos saltator</i>          | Hexapoda            | Hymenoptera   | Formicidae      |
| EZA50845                                                        | Bib      | Clonal raider ant          | <i>Cerapachys biroi</i>               | Hexapoda            | Hymenoptera   | Formicidae      |
| EGI69716/AEVX01004595                                           | Bib      | Panamanian leafcutter ant  | <i>Acromyrmex echinatior</i>          | Hexapoda            | Hymenoptera   | Formicidae      |
| ACEP_00006876                                                   | Bib      | Leafcutter ant             | <i>Atta cephalotes</i>                | Hexapoda            | Hymenoptera   | Formicidae      |
| XP_001604170                                                    | Bib      | Jewel wasp                 | <i>Nasonia vitripennis</i>            | Hexapoda            | Hymenoptera   | Pteromalidae    |
| ADA001027634/ADA001027617                                       | Bib      | Jewel wasp                 | <i>Nasonia giraulti</i>               | Hexapoda            | Hymenoptera   | Pteromalidae    |
| XP_002433221                                                    | Bib      | Human body louse           | <i>Pediculus humanus corporis</i>     | Hexapoda            | Phthiraptera  | Pediculidae     |
| ACPB02031565/ACPB02009321                                       | Bib      | Assassin bug               | <i>Rhodnius prolixus</i>              | Hexapoda            | Hemiptera     | Reduviidae      |
| XP_001948407                                                    | Bib      | Pea aphid                  | <i>Acyrtosiphon pisum</i>             | Hexapoda            | Hemiptera     | Aphididae       |
| GACJ01023397                                                    | Bib      | Asian citrus psyllid       | <i>Diaphorina citri</i>               | Hexapoda            | Hemiptera     | Psyllidae       |
| JPZV01159195/JPZV01159181/JPZV01159174                          | Bib      | German cockroach           | <i>Blattella germanica</i>            | Hexapoda            | Blattodea     | Ectobiidae      |
| GAWS01120948                                                    | Bib      | American cockroach         | <i>Periplaneta americana</i>          | Hexapoda            | Blattodea     | Blattidae       |
| GAYD01311266                                                    | Bib      | Blaberus cockroach         | <i>Blaberus atropos</i>               | Hexapoda            | Blattodea     | Blaberidae      |
| GAZN01184473                                                    | Bib      | Brown hooded cockroach     | <i>Cryptocercus wrighti</i>           | Hexapoda            | Blattodea     | Cryptocercidae  |
| GASE01250065                                                    | Bib      | Cuban subterranean termite | <i>Prohinotermes simplex</i>          | Hexapoda            | Isoptera      | Rhinotermitidae |

|                                                     |     |                               |                                      |              |                   |                  |
|-----------------------------------------------------|-----|-------------------------------|--------------------------------------|--------------|-------------------|------------------|
| AUST01019796/AUST01019797                           | Bib | Nevada dampwood termite       | <i>Zootermopsis nevadensis</i>       | Hexapoda     | Isoptera          | Termopsidae      |
| GASW01145900                                        | Bib | Praying mantis                | <i>Mantis religiosa</i>              | Hexapoda     | Mantodea          | Mantidae         |
| GAYAO1368224                                        | Bib | Zoraptid                      | <i>Zorotypus caudelli</i>            | Hexapoda     | Orthoptera        | Zorotypidae      |
| GAWU01257959                                        | Bib | Webspinner                    | <i>Aposthonia japonica</i>           | Hexapoda     | Embioptera        | Oligotomidae     |
| GAWG01145562                                        | Bib | Giant prickly stick insect    | <i>Extatosoma tiaratum</i>           | Hexapoda     | Phasmatodea       | Phasmatidae      |
| GAWC01014738                                        | Bib | Thorny stick insect           | <i>Aretaon asperimus</i>             | Hexapoda     | Phasmatodea       | Heteropterygidae |
| GAUX01120890                                        | Bib | Camel cricket                 | <i>Ceuthophilus sp.</i>              | Hexapoda     | Orthoptera        | Rhaphidophoridae |
| GAZT01171842                                        | Bib | False stick insect            | <i>Prosarthria teretirostris</i>     | Hexapoda     | Orthoptera        | Proscopiidae     |
| GBHB01007420                                        | Bib | Oceanic field cricket         | <i>Teleogryllus commodus</i>         | Hexapoda     | Orthoptera        | Gryllidae        |
| GASQ01013559                                        | Bib | Slender Groundhopper          | <i>Tetrix subulata</i>               | Hexapoda     | Orthoptera        | Tetrigidae       |
| GAUZ01380599                                        | Bib | Stripe-winged grasshopper     | <i>Stenobothrus lineatus</i>         | Hexapoda     | Orthoptera        | Acrididae        |
| AVCP010869913                                       | Bib | Migratory locust              | <i>Locusta migratoria</i>            | Hexapoda     | Orthoptera        | Acrididae        |
| GATU01061203                                        | Bib | Blue-winged olive             | <i>Baetis sp.</i>                    | Hexapoda     | Ephemeroptera     | Baetidae         |
| GAXA01112850                                        | Bib | Mahogany Dun                  | <i>Isonychia bicolor</i>             | Hexapoda     | Ephemeroptera     | Isonychiidae     |
| GAZG01101625                                        | Bib | Mayfly                        | <i>Eurylophella sp.</i>              | Hexapoda     | Ephemeroptera     | Ephemerellidae   |
| AYNC01046590/AYNC01046589                           | Bib | Green drake                   | <i>Ephemera danica</i>               | Hexapoda     | Ephemeroptera     | Ephemeridae      |
| GAYO01122019                                        | Bib | Golden-ringed dragonfly       | <i>Cordulegaster boltonii</i>        | Hexapoda     | Odonata           | Cordulegastridae |
| APVN01095476/APVN01095473                           | Bib | Scarce chaser                 | <i>Ladona fulva</i>                  | Hexapoda     | Odonata           | Libellulidae     |
| GASNO1409838                                        | Bib | Firebrat                      | <i>Thermobia domestica</i>           | Hexapoda     | Zygentoma         | Lepismatidae     |
| GAYJ01257237                                        | Bib | Silverfish                    | <i>Atelura formicaria</i>            | Hexapoda     | Zygentoma         | Nicoletiidae     |
| GASO01228638                                        | Bib | Silverfish                    | <i>Tricholepidion gertschi</i>       | Hexapoda     | Zygentoma         | Libellulidae     |
| GAUMO1007766                                        | Bib | Bristletail                   | <i>Machilis hrabei</i>               | Hexapoda     | Archaeognatha     | Machilidae       |
| GAUG01018425                                        | Bib | Bristletail                   | <i>Meinertellus cundinamarcensis</i> | Hexapoda     | Archaeognatha     | Meinertelliidae  |
| GAXJ01108916                                        | Bib | Two-pronged bristletail       | <i>Occasjapyx japonicus</i>          | Hexapoda     | Diplura           | Japygidae        |
| GAXE01131619                                        | Bib | Conehead                      | <i>Acerentomon sp.</i>               | Hexapoda     | Protura           | Acerentomidae    |
| AFFK01019694/AFFK01019695/SMAR015755                | Bib | Coastal European centipede    | <i>Strigamia maritima</i>            | Chilopoda    | Geophilomorpha    | Linotaeniidae    |
| GAFS01004822/GAFY01027786                           | Bib | Narrow-clawed crayfish        | <i>Pontastacus leptodactylus</i>     | Malacostraca | Decapoda          | Astacidae        |
| GADE01005115                                        | Bib | Australian red claw crayfish  | <i>Cherax quadricarinatus</i>        | Malacostraca | Decapoda          | Parastacidae     |
| FE778057                                            | Bib | Flat porcelain crab           | <i>Petrolisthes cinctipes</i>        | Malacostraca | Decapoda          | Porcellanidae    |
| DV467482                                            | Bib | Green shore Crab              | <i>Carcinus maenas</i>               | Malacostraca | Decapoda          | Carcinidae       |
| JW508536                                            | Bib | Tide pool copepod             | <i>Tigriopus californicus</i>        | Maxillopoda  | Harpacticoida     | Harpacticidae    |
| KR005658                                            | Bib | Salmon louse                  | <i>Lepeophtheirus salmonis</i>       | Maxillopoda  | Siphonostomatoida | Caligidae        |
| JW965321                                            | Bib | Argulus                       | <i>Argulus siamensis</i>             | Maxillopoda  | Arguloidea        | Argulidae        |
| EFX82861                                            | Bib | Common water flea             | <i>Daphnia pulex</i>                 | Branchiopoda | Diplostraca       | Daphniidae       |
| XP_002408745/XP_002408744                           | Bib | Black-legged tick             | <i>Ixodes scapularis</i>             | Acari        | Ixodida           | Ixodidae         |
| GACK01002509                                        | Bib | Zebra tick                    | <i>Rhipicephalus pulchellus</i>      | Acari        | Ixodida           | Ixodidae         |
| CK185295                                            | Bib | Southern cattle tick          | <i>Rhipicephalus microplus</i>       | Acari        | Ixodida           | Ixodidae         |
| GW003922                                            | Bib | Two-spotted spider mite       | <i>Tetranychus urticae</i>           | Acari        | Acariformes       | Tetranychidae    |
| AZAQ01093526/AZAQ01093525/AZAQ01093524/GAZR01022102 | Bib | African social eresid spider  | <i>Stegodyphus mimosarum</i>         | Arachnida    | Araneae           | Eresidae         |
| GBCS01010810                                        | Bib | Western black widow           | <i>Latrodectus hesperus</i>          | Arachnida    | Araneae           | Theridiidae      |
| AOMJ01042817/AOMJ01089836/AOMJ01042847/AOMJ01042849 | Bib | Common house spider           | <i>Parasteatoda tepidariorum</i>     | Arachnida    | Araneae           | Theridiidae      |
| AYEL01087177                                        | Bib | Chinese scorpion              | <i>Mesobuthus martensii</i>          | Arachnida    | Scorpiones        | Buthidae         |
| AXZ01186657                                         | Bib | Baja California bark scorpion | <i>Centruroides exilicauda</i>       | Arachnida    | Scorpiones        | Buthidae         |

#### Hexapoda Drip

|                           |        |                            |                                       |          |             |                |
|---------------------------|--------|----------------------------|---------------------------------------|----------|-------------|----------------|
| FBpp0087240               | Drip   | Fruit fly                  | <i>Drosophila melanogaster</i>        | Hexapoda | Diptera     | Drosophilidae  |
| FBpp0201903               | Drip   | Fruit fly                  | <i>Drosophila sechellia</i>           | Hexapoda | Diptera     | Drosophilidae  |
| FBpp0258530               | Drip   | Fruit fly                  | <i>Drosophila yakuba</i>              | Hexapoda | Diptera     | Drosophilidae  |
| FBpp0141192               | Drip   | Fruit fly                  | <i>Drosophila erecta</i>              | Hexapoda | Diptera     | Drosophilidae  |
| FBpp0115586               | Drip   | Fruit fly                  | <i>Drosophila ananassae</i>           | Hexapoda | Diptera     | Drosophilidae  |
| FBpp0276838               | Drip   | Fruit fly                  | <i>Drosophila pseudoobscura</i>       | Hexapoda | Diptera     | Drosophilidae  |
| FBpp0236388               | Drip   | Fruit fly                  | <i>Drosophila virilis</i>             | Hexapoda | Diptera     | Drosophilidae  |
| FBpp0170266               | Drip   | Fruit fly                  | <i>Drosophila mojavensis</i>          | Hexapoda | Diptera     | Drosophilidae  |
| FBpp0154409               | Drip   | Fruit fly                  | <i>Drosophila grimshawi</i>           | Hexapoda | Diptera     | Drosophilidae  |
| FBpp0251027               | Drip   | Fruit fly                  | <i>Drosophila willistoni</i>          | Hexapoda | Diptera     | Drosophilidae  |
| BAM26200                  | Drip   | Black blowfly              | <i>Phormia regina</i>                 | Hexapoda | Diptera     | Calliphoridae  |
| AEG47703                  | Drip   | Oriental latrine fly       | <i>Chrysomya megacephala</i>          | Hexapoda | Diptera     | Calliphoridae  |
| Q25074                    | Drip   | Buffalo fly                | <i>Haematobia irritans exigua</i>     | Hexapoda | Diptera     | Muscidae       |
| ADD19102                  | Drip 1 | Tsetse fly                 | <i>Glossina morsitans morsitans</i>   | Hexapoda | Diptera     | Glossinidae    |
| ADD20051                  | Drip 2 | Tsetse fly                 | <i>Glossina morsitans morsitans</i>   | Hexapoda | Diptera     | Glossinidae    |
| FG293007/FG295048         | Drip   | Primary screw-worm         | <i>Cochliomyia hominivorax</i>        | Hexapoda | Diptera     | Calliphoridae  |
| AAEL003512/XP_001656931   | Drip   | Yellow fever mosquito      | <i>Aedes aegypti</i>                  | Hexapoda | Diptera     | Culicidae      |
| CPIU015704/CPIU015704     | Drip   | Southern house mosquito    | <i>Culex quinquefasciatus</i>         | Hexapoda | Diptera     | Culicidae      |
| JAA93938                  | Drip   | Psorophora mosquito        | <i>Psorophora albipes</i>             | Hexapoda | Diptera     | Culicidae      |
| AGAP008842                | Drip   | African malaria mosquito   | <i>Anopheles gambiae</i>              | Hexapoda | Diptera     | Culicidae      |
| EZ976133                  | Drip   | African malaria mosquito   | <i>Anopheles funestus</i>             | Hexapoda | Diptera     | Culicidae      |
| GAAK01006851/GAAK01006849 | Drip   | Antarctic flightless midge | <i>Belgica antarctica</i>             | Hexapoda | Diptera     | Chironomidae   |
| ABV60346                  | Drip   | Sand fly                   | <i>Lutzomyia longipalpis</i>          | Hexapoda | Diptera     | Psychodidae    |
| GAKJ01008613              | Drip   | Orange wheat blossom midge | <i>Sitodiplosis mosellana</i>         | Hexapoda | Diptera     | Cecidomyiidae  |
| AB178640                  | Drip   | Domestic silkworm          | <i>Bombyx mori</i>                    | Hexapoda | Lepidoptera | Bombycidae     |
| CAEZ01007264/CAEZ01007265 | Drip   | Postman butterfly          | <i>Heliconius melpomene melpomene</i> | Hexapoda | Lepidoptera | Nymphalidae    |
| EHJ75085                  | Drip   | Monarch butterfly          | <i>Danaus plexippus</i>               | Hexapoda | Lepidoptera | Nymphalidae    |
| FQ019249                  | Drip   | African cotton leafworm    | <i>Spodoptera littoralis</i>          | Hexapoda | Lepidoptera | Noctuidae      |
| GAFU01003217              | Drip   | Beet armyworm              | <i>Spodoptera exigua</i>              | Hexapoda | Lepidoptera | Noctuidae      |
| HO053923                  | Drip   | Tobacco budworm            | <i>Heliothis virescens</i>            | Hexapoda | Lepidoptera | Noctuidae      |
| EZ583816                  | Drip   | western bean cutworm       | <i>Striacosta albicosta</i>           | Hexapoda | Lepidoptera | Noctuidae      |
| BAM19007                  | Drip   | Common mormon              | <i>Papilio polytes</i>                | Hexapoda | Lepidoptera | Papilionidae   |
| BAM17858                  | Drip   | Asian Swallowtail          | <i>Papilio xuthus</i>                 | Hexapoda | Lepidoptera | Papilionidae   |
| AFC34081                  | Drip   | striped riceborer          | <i>Chilo suppressalis</i>             | Hexapoda | Lepidoptera | Crambidae      |
| JP612973                  | Drip   | Propretius duskywing       | <i>Erynnis propertius</i>             | Hexapoda | Lepidoptera | Hesperiidae    |
| JO817751/GR920919         | Drip   | Tobacco hornworm           | <i>Manduca sexta</i>                  | Hexapoda | Lepidoptera | Sphingidae     |
| BAH47554                  | Drip   | Oriental fruit moth        | <i>Grapholita molesta</i>             | Hexapoda | Lepidoptera | Tortricidae    |
| TC011257                  | Drip   | Red flour Beetle           | <i>Tribolium castaneum</i>            | Hexapoda | Coleoptera  | Tenebrionidae  |
| BAM83568                  | Drip   | Beetle                     | <i>Anomala cuprea</i>                 | Hexapoda | Coleoptera  | Scarabaeidae   |
| JR487579                  | Drip   | Red palm weevil            | <i>Rhynchophorus ferrugineus</i>      | Hexapoda | Coleoptera  | Curculionidae  |
| AE663193                  | Drip   | Mountain pine weevil       | <i>Dendroctonus ponderosae</i>        | Hexapoda | Coleoptera  | Curculionidae  |
| JU414336                  | Drip   | Salt marsh beetle          | <i>Pogonius chalcus</i>               | Hexapoda | Coleoptera  | Carabidae      |
| GAPE01027420              | Drip   | Pollen beetle              | <i>Brassicogethes aeneus</i>          | Hexapoda | Coleoptera  | Nitidulidae    |
| GAAB01000751              | Drip   | Emerald ash borer          | <i>Agrilus planipennis</i>            | Hexapoda | Coleoptera  | Buprestidae    |
| GAXW01087449              | Drip   | Antlion                    | <i>Euroleon nostras</i>               | Hexapoda | Neoptera    | Myrmeleontidae |
| GAVV01176955              | Drip   | Green lacewing             | <i>Pseudomallada prasinus</i>         | Hexapoda | Neoptera    | Chrysopidae    |
| XP_003394164              | Drip   | Buff-tailed bumblebee      | <i>Bombus terrestris</i>              | Hexapoda | Hymenoptera | Apidae         |
| XP_003487533              | Drip   | Common eastern bumble bee  | <i>Bombus impatiens</i>               | Hexapoda | Hymenoptera | Apidae         |
| XP_624531                 | Drip   | Honey bee                  | <i>Apis mellifera</i>                 | Hexapoda | Hymenoptera | Apidae         |
| XP_003701708              | Drip   | Alfalfa leafcutting bee    | <i>Megachile rotundata</i>            | Hexapoda | Hymenoptera | Megachilidae   |
| AEAQ01012360/EFZ22501     | Drip   | Red fire ant               | <i>Solenopsis invicta</i>             | Hexapoda | Hymenoptera | Formicidae     |
| AEAB01004718/EFN72836     | Drip   | Florida carpenter ant      | <i>Camponotus floridanus</i>          | Hexapoda | Hymenoptera | Formicidae     |
| JP783671/JP783671         | Drip   | Caribbean crazy ant        | <i>Nylanderia pubens</i>              | Hexapoda | Hymenoptera | Formicidae     |
| ADOQ01012968              | Drip   | Argentine ant              | <i>Linepithema humile</i>             | Hexapoda | Hymenoptera | Formicidae     |



|                                                     |            |                                 |                                      |          |                  |                     |
|-----------------------------------------------------|------------|---------------------------------|--------------------------------------|----------|------------------|---------------------|
| XP_001607940                                        | Drip       | Jewel wasp                      | <i>Nasonia vitripennis</i>           | Hexapoda | Hymenoptera      | Pteromalidae        |
| GAKG01000818                                        | Drip       | Diamondback moth parasitoid     | <i>Cotesia vestalis</i>              | Hexapoda | Hymenoptera      | Braconidae          |
| EEB12655                                            | Drip       | Human body louse                | <i>Pediculus humanus corporis</i>    | Hexapoda | Phthiraptera     | Pediculidae         |
| GAWR01000696                                        | Drip       | Poultry shaft louse             | <i>Menopon gallinae</i>              | Hexapoda | Phthiraptera     | Menoponidae         |
| GAYV01109739                                        | Drip       | Booklice                        | <i>Liposcelis bostrychophila</i>     | Hexapoda | Psocoptera       | Liposcelidae        |
| GAPTO1006904                                        | Drip       | Booklice                        | <i>Ectopsocus briggsi</i>            | Hexapoda | Psocoptera       | Ectopsocidae        |
| GAXD01024860                                        | Drip       | Western flower thrips           | <i>Frankliniella occidentalis</i>    | Hexapoda | Thysanoptera     | Thripidae           |
| JAA75980                                            | Drip       | Assassin bug                    | <i>Rhodnius prolixus</i>             | Hexapoda | Hemiptera        | Reduviidae          |
| KF048092                                            | Drip       | Lygus bug                       | <i>Lygus hesperus</i>                | Hexapoda | Hemiptera        | Miridae             |
| GAJX01005354                                        | Drip       | Pod sucking bug                 | <i>Clavigralla tomentosicollis</i>   | Hexapoda | Hemiptera        | Coreidae            |
| GAJW01004051                                        | Drip       | Cowpea aphid                    | <i>Aphis craccivora</i>              | Hexapoda | Hemiptera        | Aphididae           |
| ACLO1373                                            | Drip       | Pea aphid                       | <i>Acyrtosiphon pisum</i>            | Hexapoda | Hemiptera        | Aphididae           |
| GAAF01000345                                        | Drip       | Potato aphid                    | <i>Macrosiphum euphorbiae</i>        | Hexapoda | Hemiptera        | Aphididae           |
| EE571220                                            | Drip       | Green peach aphid               | <i>Myzus persicae</i>                | Hexapoda | Hemiptera        | Aphididae           |
| F0035865                                            | Drip       | Shallot aphid                   | <i>Myzus ascalonicus</i>             | Hexapoda | Hemiptera        | Aphididae           |
| ABW96354                                            | Drip       | Sweet potato whitefly           | <i>Bemisia tabaci</i>                | Hexapoda | Hemiptera        | Aleyrodidae         |
| Q23808                                              | Drip       | Green leafhopper                | <i>Cicadella viridis</i>             | Hexapoda | Hemiptera        | Cicadellidae        |
| GAGF01044362                                        | Drip       | Green lacewing                  | <i>Chrysopa pallens</i>              | Hexapoda | Neoptera         | Chrysopidae         |
| JPZV01194828                                        | Drip       | German cockroach                | <i>Blattella germanica</i>           | Hexapoda | Blattodea        | Ectobiidae          |
| GAWS01023831                                        | Drip       | American cockroach              | <i>Periplaneta americana</i>         | Hexapoda | Blattodea        | Blattidae           |
| GAYD01018072                                        | Drip       | Blaberus cockroach              | <i>Blaberus atropos</i>              | Hexapoda | Blattodea        | Blaberidae          |
| GAZN01021910                                        | Drip       | Brown hooded cockroach          | <i>Cryptocercus wrighti</i>          | Hexapoda | Blattodea        | Cryptocercidae      |
| AUST01002328/AUST01002331/AUST01002332              | Drip       | Nevada dampwood termite         | <i>Zootermopsis nevadensis</i>       | Hexapoda | Isoptera         | Termopsidae         |
| BAG72254                                            | Drip       | Formosan subterranean termite   | <i>Coptotermes formosanus</i>        | Hexapoda | Isoptera         | Rhinotermitidae     |
| GASE01015407                                        | Drip 1     | Cuban subterranean termite      | <i>Rhinoitermes simplex</i>          | Hexapoda | Isoptera         | Rhinotermitidae     |
| GASE01015406                                        | Drip 2     | Cuban subterranean termite      | <i>Prorethitermes simplex</i>        | Hexapoda | Isoptera         | Rhinotermitidae     |
| FL637621/G0899611                                   | Drip       | Eastern subterranean termite    | <i>Reticulitermes flavipes</i>       | Hexapoda | Isoptera         | Rhinotermitidae     |
| GATB01242877                                        | Drip       | Metallicid mantis               | <i>Metallicidius splendidus</i>      | Hexapoda | Mantodea         | Metallicidae        |
| GASW01221493                                        | Drip       | Praying mantis                  | <i>Mantis religiosa</i>              | Hexapoda | Mantodea         | Mantidae            |
| GAYA01397859                                        | Drip       | Zoraptid                        | <i>Zorotypus caudelli</i>            | Hexapoda | Orthoptera       | Zorotypidae         |
| GAYQ01184451                                        | Drip       | European earwig                 | <i>Forficula auricularia</i>         | Hexapoda | Dermaptera       | Forficulidae        |
| GAUF01006901                                        | Drip       | Leuctra                         | <i>Leuctra sp.</i>                   | Hexapoda | Plecoptera       | Leuctridae          |
| GATV01089684                                        | Drip       | Stonefly                        | <i>Perla marginata</i>               | Hexapoda | Plecoptera       | Perlidae            |
| GAWU01021632                                        | Drip       | Webspinner                      | <i>Aposthonia japonica</i>           | Hexapoda | Embioptera       | Oligotomidae        |
| GAWG01027137                                        | Drip       | Giant prickly stick insect      | <i>Extatosoma tiaratum</i>           | Hexapoda | Phasmatodea      | Phasmatidae         |
| GAWE01111259                                        | Drip       | Vietnamese walking stick insect | <i>Ramulus artemis</i>               | Hexapoda | Phasmatodea      | Phasmatidae         |
| GAWD01031379                                        | Drip       | Vietnamese walking stick        | <i>Medauroidea extradentata</i>      | Hexapoda | Phasmatodea      | Phasmatidae         |
| GAWC01082932                                        | Drip       | Thorny stick insect             | <i>Aretaon asperimus</i>             | Hexapoda | Phasmatodea      | Heteropterygidae    |
| GAXB01016476                                        | Drip       | Heelwalker                      | <i>Tanzaniophasma sp.</i>            | Hexapoda | Mantophasmatodea | Tanzaniophasmatidae |
| GAUX01016809                                        | Drip       | Camel cricket                   | <i>Ceuthophilus sp.</i>              | Hexapoda | Orthoptera       | Rhaphidophoridae    |
| GAZT01011867                                        | Drip       | False stick insect              | <i>Prosarthria teretirostris</i>     | Hexapoda | Orthoptera       | Proscopiidae        |
| GAIZ01003265/GAIZ01000499                           | Drip       | Sand field cricket              | <i>Gryllus firmus</i>                | Hexapoda | Orthoptera       | Gryllidae           |
| GBHB01065040                                        | Drip       | Oceanic field cricket           | <i>Teleogryllus commodus</i>         | Hexapoda | Orthoptera       | Gryllidae           |
| GASQ01128475                                        | Drip       | Slender Groundhopper            | <i>Tetrix subulata</i>               | Hexapoda | Orthoptera       | Tetrigidae          |
| JG680985                                            | Drip       | Desert locust                   | <i>Schistocerca gregaria</i>         | Hexapoda | Orthoptera       | Acrididae           |
| CO850494/AVCP010961306                              | Drip       | Migratory locust                | <i>Locusta migratoria</i>            | Hexapoda | Orthoptera       | Acrididae           |
| GAUZ01033299                                        | Drip       | Stripe-winged grasshopper       | <i>Stenobothrus lineatus</i>         | Hexapoda | Orthoptera       | Acrididae           |
| GAXA01100045                                        | Drip       | Mahogany Dun                    | <i>Isonychia bicolor</i>             | Hexapoda | Ephemeroptera    | Isonychiidae        |
| GAZG01016414                                        | Drip       | Mayfly                          | <i>Eurylophella sp.</i>              | Hexapoda | Ephemeroptera    | Ephemerellidae      |
| AYNC01036599/AYNC01036594/AYNC01036593/AYNC01036592 | Drip       | Green drake                     | <i>Ephemera danica</i>               | Hexapoda | Ephemeroptera    | Ephemeridae         |
| GAYO01010968                                        | Drip       | Golden-ringed dragonfly         | <i>Cordulegaster boltonii</i>        | Hexapoda | Odonata          | Cordulegastridae    |
| GAEQ01000128                                        | Drip 1     | Hagen's bluet                   | <i>Enallagma hageni</i>              | Hexapoda | Odonata          | Coenagrionidae      |
| GAEQ01002752                                        | Drip 2     | Hagen's bluet                   | <i>Enallagma hageni</i>              | Hexapoda | Odonata          | Coenagrionidae      |
| APVN01111337/APVN01111338/APVN01111340              | Drip       | Scarce chaser                   | <i>Ladona fulva</i>                  | Hexapoda | Odonata          | Libellulidae        |
| GASN01407843                                        | Drip       | Firebrat                        | <i>Thermobia domestica</i>           | Hexapoda | Zygentoma        | Lepismatidae        |
| GAYJ01029112                                        | Drip       | Silverfish                      | <i>Atelura formicaria</i>            | Hexapoda | Zygentoma        | Nicoletiidae        |
| GASO01258000                                        | Drip       | Silverfish                      | <i>Tricholepidium gertschi</i>       | Hexapoda | Zygentoma        | Libellulidae        |
| GAUM01185038                                        | Drip       | Bristletail                     | <i>Machilis hrabei</i>               | Hexapoda | Archaeognatha    | Machilidae          |
| G AUG01019014                                       | Drip       | Bristletail                     | <i>Meinertellus cundinamarcensis</i> | Hexapoda | Archaeognatha    | Meinertellidae      |
| GAYN01143457                                        | Drip       | Campodea                        | <i>Campodea augens</i>               | Hexapoda | Diplura          | Campodeidae         |
| GAMM01004264/GAMM01007190                           | Drip       | Springtail                      | <i>Orchesella cincta</i>             | Hexapoda | Collembola       | Entomobryidae       |
| EV475341/GASX01090561/GAMN01000162                  | Drip       | Springtail                      | <i>Folsomia candida</i>              | Hexapoda | Collembola       | Isotomidae          |
| sb_006_05H07                                        | Drip -like | Springtail                      | <i>Megaphora arctica</i>             | Hexapoda | Collembola       | Oncyhuriidae        |
| GATZ01010361                                        | Drip -like | Clover springtail               | <i>Sminthurus viridis</i>            | Hexapoda | Collembola       | Sminthuridae        |
| GAEU01009798                                        | Drip -like | Cosmopolitan springtail         | <i>Anurida maritima</i>              | Hexapoda | Collembola       | Neanuridae          |
| GAXI01003650                                        | Drip -like | Giant springtail                | <i>Tetradontophora bielanensis</i>   | Hexapoda | Collembola       | Oncyhuriidae        |
| GATD01013001                                        | Drip -like | Springtail                      | <i>Pogonognathellus sp.</i>          | Hexapoda | Collembola       | Tomoceridae         |

#### Arthropoda Prip

|                                         |        |                            |                                       |          |             |               |
|-----------------------------------------|--------|----------------------------|---------------------------------------|----------|-------------|---------------|
| FBpp0087236                             | Prip   | Fruit fly                  | <i>Drosophila melanogaster</i>        | Hexapoda | Diptera     | Drosophilidae |
| FBpp0202768                             | Prip   | Fruit fly                  | <i>Drosophila sechellia</i>           | Hexapoda | Diptera     | Drosophilidae |
| FBpp0209200                             | Prip   | Fruit fly                  | <i>Drosophila simulans</i>            | Hexapoda | Diptera     | Drosophilidae |
| FBpp0257373                             | Prip   | Fruit fly                  | <i>Drosophila yakuba</i>              | Hexapoda | Diptera     | Drosophilidae |
| FBpp0138749                             | Prip   | Fruit fly                  | <i>Drosophila erecta</i>              | Hexapoda | Diptera     | Drosophilidae |
| FBpp0115747                             | Prip   | Fruit fly                  | <i>Drosophila ananassae</i>           | Hexapoda | Diptera     | Drosophilidae |
| FBpp0277602                             | Prip   | Fruit fly                  | <i>Drosophila pseudoobscura</i>       | Hexapoda | Diptera     | Drosophilidae |
| FBpp0234775                             | Prip   | Fruit fly                  | <i>Drosophila virilis</i>             | Hexapoda | Diptera     | Drosophilidae |
| FBpp0167781                             | Prip   | Fruit fly                  | <i>Drosophila mojavensis</i>          | Hexapoda | Diptera     | Drosophilidae |
| FBpp0155293                             | Prip   | Fruit fly                  | <i>Drosophila grimshawi</i>           | Hexapoda | Diptera     | Drosophilidae |
| FBpp0250560                             | Prip   | Fruit fly                  | <i>Drosophila willistoni</i>          | Hexapoda | Diptera     | Drosophilidae |
| ACT34032                                | Prip   | Goldenrod gall fly         | <i>Eurosta solidaginis</i>            | Hexapoda | Diptera     | Tephritidae   |
| ADD19396                                | Prip 1 | Tsetse fly                 | <i>Glossina morsitans morsitans</i>   | Hexapoda | Diptera     | Glossinidae   |
| AFP49895                                | Prip 2 | Tsetse fly                 | <i>Glossina morsitans morsitans</i>   | Hexapoda | Diptera     | Glossinidae   |
| AAEL003550/XP_001656932                 | Prip   | Yellow fever mosquito      | <i>Aedes aegypti</i>                  | Hexapoda | Diptera     | Culicidae     |
| CPU015700                               | Prip   | Southern house mosquito    | <i>Culex quinquefasciatus</i>         | Hexapoda | Diptera     | Culicidae     |
| AGAP008843                              | Prip   | African malaria mosquito   | <i>Anopheles gambiae</i>              | Hexapoda | Diptera     | Culicidae     |
| BAF62090                                | Prip   | Sleeping chironomid        | <i>Polypedilum vanderplanki</i>       | Hexapoda | Diptera     | Chironomidae  |
| BAK32937/BAK32936/BAK32935/GAAK01006838 | Prip 1 | Antarctic flightless midge | <i>Belgica antarctica</i>             | Hexapoda | Diptera     | Chironomidae  |
| GAAK01006838                            | Prip 2 | Antarctic flightless midge | <i>Belgica antarctica</i>             | Hexapoda | Diptera     | Chironomidae  |
| NP_001153661                            | Prip   | Domestic silkworm          | <i>Bombyx mori</i>                    | Hexapoda | Lepidoptera | Bombycidae    |
| CAEZ01007983                            | Prip   | Postman butterfly          | <i>Heliconius melpomene melpomene</i> | Hexapoda | Lepidoptera | Nymphalidae   |
| EL599805/EL596094                       | Prip   | Red postman                | <i>Heliconius erato</i>               | Hexapoda | Lepidoptera | Nymphalidae   |
| EHJ66754                                | Prip   | Monarch butterfly          | <i>Danaus plexippus</i>               | Hexapoda | Lepidoptera | Nymphalidae   |
| EZ981212                                | Prip   | African cotton leafworm    | <i>Spodoptera littoralis</i>          | Hexapoda | Lepidoptera | Noctuidae     |
| GAFU01006086                            | Prip   | Beet armyworm              | <i>Spodoptera exigua</i>              | Hexapoda | Lepidoptera | Noctuidae     |
| JP717913                                | Prip   | Asian Swallowtail          | <i>Papilio xuthus</i>                 | Hexapoda | Lepidoptera | Papilionidae  |
| GAJS01000346                            | Prip   | striped riceborer          | <i>Chilo suppressalis</i>             | Hexapoda | Lepidoptera | Crambidae     |
| JP612966                                | Prip   | Propertius duskywing       | <i>Erynnis propertius</i>             | Hexapoda | Lepidoptera | Hesperiidae   |
| J0818733                                | Prip   | Tobacco hornworm           | <i>Manduca sexta</i>                  | Hexapoda | Lepidoptera | Sphingidae    |

|                                        |             |                                 |                                     |          |                  |                     |
|----------------------------------------|-------------|---------------------------------|-------------------------------------|----------|------------------|---------------------|
| TC001374                               | Prip        | Red flour Beetle                | <i>Tribolium castaneum</i>          | Hexapoda | Coleoptera       | Tenebrionidae       |
| AE661850                               | Prip        | Mountain pine weevil            | <i>Dendroctonus ponderosae</i>      | Hexapoda | Coleoptera       | Curculionidae       |
| JU408944                               | Prip        | Salt marsh beetle               | <i>Pogonus chalcus</i>              | Hexapoda | Coleoptera       | Carabidae           |
| AAL09065                               | Prip        | Firefly                         | <i>Pyrocoelia rufa</i>              | Hexapoda | Coleoptera       | Lampyridae          |
| GAXW01003825                           | Prip        | Antlion                         | <i>Euroleon nostras</i>             | Hexapoda | Neoptera         | Myrmeleontidae      |
| GAVV01005429                           | Prip        | Green lacewing                  | <i>Pseudomallada prasinus</i>       | Hexapoda | Neoptera         | Chrysopidae         |
| XP_003394168/XP_003394169              | Prip        | Buff-tailed bumblebee           | <i>Bombus terrestris</i>            | Hexapoda | Hymenoptera      | Apidae              |
| XP_0033487537/XP_0033487538            | Prip        | Common eastern bumble bee       | <i>Bombus impatiens</i>             | Hexapoda | Hymenoptera      | Apidae              |
| XP_394391                              | Prip        | Honey bee                       | <i>Apis mellifera</i>               | Hexapoda | Hymenoptera      | Apidae              |
| XP_003701667                           | Prip        | Alfalfa leafcutting bee         | <i>Megachile rotundata</i>          | Hexapoda | Hymenoptera      | Megachilidae        |
| GAFR01021571                           | Prip        | Neotropical paper wasp          | <i>Polistes canadensis</i>          | Hexapoda | Hymenoptera      | Vespidae            |
| EFN88447                               | Prip        | Jerdon's jumping ant            | <i>Harpegnathos saltator</i>        | Hexapoda | Hymenoptera      | Formicidae          |
| EFN72835                               | Prip        | Florida carpenter ant           | <i>Camponotus floridanus</i>        | Hexapoda | Hymenoptera      | Formicidae          |
| ACEP_00007751                          | Prip        | Leafcutter ant                  | <i>Atta cephalotes</i>              | Hexapoda | Hymenoptera      | Formicidae          |
| XP_001607929                           | Prip        | Jewel wasp                      | <i>Nasonia vitripennis</i>          | Hexapoda | Hymenoptera      | Pteromalidae        |
| ADA001292418/ADA001292417/ADA001292415 | Prip        | Jewel wasp                      | <i>Nasonia giraulti</i>             | Hexapoda | Hymenoptera      | Pteromalidae        |
| EEB16742                               | Prip        | Human body louse                | <i>Pediculus humanus corporis</i>   | Hexapoda | Phthiraptera     | Pediculidae         |
| GAWR01000697                           | Egpl        | Poultry shaft louse             | <i>Menopon gallinae</i>             | Hexapoda | Phthiraptera     | Menoponidae         |
| GAYV01110104                           | Egpl        | Booklice                        | <i>Liposcelis bostrychophila</i>    | Hexapoda | Psocoptera       | Liposcelidae        |
| GAP01004386                            | Egpl        | Booklice                        | <i>Ectopsocus briggisi</i>          | Hexapoda | Psocoptera       | Ectopsocidae        |
| GAXD01020785                           | Prip        | Western flower thrips           | <i>Frankliniella occidentalis</i>   | Hexapoda | Thysanoptera     | Thripidae           |
| GAHY01001529                           | Prip        | Assassin bug                    | <i>Rhodnius prolixus</i>            | Hexapoda | Hemiptera        | Reduviidae          |
| KF048099                               | Prip        | Lygus bug                       | <i>Lygus hesperus</i>               | Hexapoda | Hemiptera        | Miridae             |
| KF048100                               | Prip        | Lygus bug                       | <i>Lygus hesperus</i>               | Hexapoda | Hemiptera        | Miridae             |
| HP661479                               | Prip        | Sweet potato whitefly           | <i>Bemisia tabaci</i>               | Hexapoda | Hemiptera        | Aleyrodidae         |
| AHB86600                               | Prip        | potato/tomato psyllid           | <i>Bactericera cockerelli</i>       | Hexapoda | Hemiptera        | Triozidae           |
| DN195967                               | Prip        | Glassy-winged sharpshooter      | <i>Homalodisca vitripennis</i>      | Hexapoda | Hemiptera        | Cicadellidae        |
| GAGF01006829                           | Prip        | Green lacewing                  | <i>Chrysopa pallens</i>             | Hexapoda | Neoptera         | Chrysopidae         |
| CBY77924/GBID01001247                  | Prip        | German cockroach                | <i>Blattella germanica</i>          | Hexapoda | Blattodea        | Ectobiidae          |
| GAWS01258646                           | Prip        | American cockroach              | <i>Periplaneta americana</i>        | Hexapoda | Blattodea        | Blattidae           |
| GAYD01029081                           | Prip        | Blaberus cockroach              | <i>Blaberus atropos</i>             | Hexapoda | Blattodea        | Blaberidae          |
| GAZN01019011                           | Prip        | Brown hooded cockroach          | <i>Cryptocercus wrighti</i>         | Hexapoda | Blattodea        | Cryptocercidae      |
| AUST01002325/AUST01002324              | Prip        | Nevada dampwood termite         | <i>Zootermopsis nevadensis</i>      | Hexapoda | Isoptera         | Termitidae          |
| JK445261/JK445262                      | Prip        | Formosan subterranean termite   | <i>Coptotermes formosanus</i>       | Hexapoda | Isoptera         | Rhinotermitidae     |
| GASE01253679                           | Prip        | Cuban subterranean termite      | <i>Prohinotermes simplex</i>        | Hexapoda | Isoptera         | Rhinotermitidae     |
| FL638365/G0907955                      | Prip        | Eastern subterranean termite    | <i>Reticulitermes flavipes</i>      | Hexapoda | Isoptera         | Rhinotermitidae     |
| GATB01001403                           | Prip        | Metallyticid mantis             | <i>Metallyticus splendidus</i>      | Hexapoda | Mantodea         | Metallyticidae      |
| GASW01019624                           | Prip        | Praying mantis                  | <i>Mantis religiosa</i>             | Hexapoda | Mantodea         | Mantidae            |
| GAYQ01017598                           | Prip        | European earwig                 | <i>Forficula auricularia</i>        | Hexapoda | Dermaptera       | Forficulidae        |
| GAYL01013696                           | Prip        | Stonefly                        | <i>Cosmioperla kuna</i>             | Hexapoda | Plecoptera       | Eustheniidae        |
| GAUF01007405                           | Prip        | Leuctra                         | <i>Leuctra sp.</i>                  | Hexapoda | Plecoptera       | Leuctridae          |
| GAYL01013696                           | Prip        | Stonefly                        | <i>Perla marginata</i>              | Hexapoda | Plecoptera       | Perlidae            |
| GAWU01256075                           | Prip        | Webspinner                      | <i>Aposthonia japonica</i>          | Hexapoda | Embioptera       | Oligotomidae        |
| GAWG01042575                           | Prip        | Giant prickly stick insect      | <i>Extatosoma tiaratum</i>          | Hexapoda | Phasmatodea      | Phasmatidae         |
| GAWE01078541                           | Prip        | Vietnamese walking stick insect | <i>Ramulus artemis</i>              | Hexapoda | Phasmatodea      | Phasmatidae         |
| GAWD01074919                           | Prip        | Vietnamese walking stick        | <i>Medauroidea extradentata</i>     | Hexapoda | Phasmatodea      | Phasmatidae         |
| GAWF01050038/GAWF01050037              | Prip        | Pink winged stick insect        | <i>Sipyloidea sipyilus</i>          | Hexapoda | Phasmatodea      | Diapheromeridae     |
| GAWC01082955                           | Prip        | Thorny stick insect             | <i>Areton asperimus</i>             | Hexapoda | Phasmatodea      | Heteropterygidae    |
| GAXB01016385                           | Prip        | Heelwalker                      | <i>Tanzaniophasma sp.</i>           | Hexapoda | Mantophasmatodea | Tanzaniophasmatidae |
| GAXU01030554                           | Prip        | Camel cricket                   | <i>Ceuthophilus sp.</i>             | Hexapoda | Orthoptera       | Rhaphidophoridae    |
| GAZT01006221                           | Prip        | False stick insect              | <i>Prosarthria teretirostris</i>    | Hexapoda | Orthoptera       | Proscopiidae        |
| GAIZ01018549                           | Prip        | Sand field cricket              | <i>Gryllus firmus</i>               | Hexapoda | Orthoptera       | Gryllidae           |
| DC443641                               | Prip        | Two-spotted cricket             | <i>Gryllus bimaculatus</i>          | Hexapoda | Orthoptera       | Gryllidae           |
| EH632028/EH639574                      | Prip        | Hawaiian swordtail cricket      | <i>Laupala kohalensis</i>           | Hexapoda | Orthoptera       | Gryllidae           |
| GBHB01027253                           | Prip        | Oceanic field cricket           | <i>Teleogryllus commodus</i>        | Hexapoda | Orthoptera       | Gryllidae           |
| GASQ01011894                           | Prip        | Slender Groundhopper            | <i>Tetrix subulata</i>              | Hexapoda | Orthoptera       | Tetrigidae          |
| CO821055/CO821056                      | Prip        | Migratory locust                | <i>Locusta migratoria</i>           | Hexapoda | Orthoptera       | Acrididae           |
| GAUZ01034179                           | Prip        | Stripe-winged grasshopper       | <i>Stenobothrus lineatus</i>        | Hexapoda | Orthoptera       | Acrididae           |
| GATU01010497                           | Prip        | Blue-winged olive               | <i>Baetis sp.</i>                   | Hexapoda | Ephemeroptera    | Baetidae            |
| GAXA01011140                           | Prip        | Mahogany Dun                    | <i>Isonychia bicolor</i>            | Hexapoda | Ephemeroptera    | Isonychiidae        |
| GAZG01016497                           | Prip        | Mayfly                          | <i>Eurylophella sp.</i>             | Hexapoda | Ephemeroptera    | Ephemerellidae      |
| AYNC01078222                           | Prip        | Green drake                     | <i>Ephemera danica</i>              | Hexapoda | Ephemeroptera    | Ephemeridae         |
| GAYM01100186                           | Prip        | Banded damoiselle               | <i>Calopteryx splendens</i>         | Hexapoda | Odonata          | Calopterygidae      |
| GAVW01127800                           | Prip        | Dragonfly                       | <i>Epiophlebia superstes</i>        | Hexapoda | Odonata          | Epiophlebiidae      |
| GAYO01130920                           | Prip 1      | Golden-ringed dragonfly         | <i>Cordulegaster boltonii</i>       | Hexapoda | Odonata          | Cordulegastridae    |
| GAYO01011149                           | Prip 2      | Golden-ringed dragonfly         | <i>Cordulegaster boltonii</i>       | Hexapoda | Odonata          | Cordulegastridae    |
| APVN01148320                           | Prip 1      | Scarce chaser                   | <i>Ladona fulva</i>                 | Hexapoda | Odonata          | Libellulidae        |
| APVN01148314/APVN01148315              | Prip 2      | Scarce chaser                   | <i>Ladona fulva</i>                 | Hexapoda | Odonata          | Libellulidae        |
| APVN01148320/APVN01148322              | Prip 3      | Scarce chaser                   | <i>Ladona fulva</i>                 | Hexapoda | Odonata          | Libellulidae        |
| APVN01148322                           | Prip 4      | Scarce chaser                   | <i>Ladona fulva</i>                 | Hexapoda | Odonata          | Libellulidae        |
| GASN01409111                           | Prip        | Firebrat                        | <i>Thermobia domestica</i>          | Hexapoda | Zygentoma        | Lepismatidae        |
| GAYJ01029739                           | Prip        | Silverfish                      | <i>Atelura formicaria</i>           | Hexapoda | Zygentoma        | Nicoletidae         |
| GASO01021146                           | Prip        | Silverfish                      | <i>Tricholepidion gertschi</i>      | Hexapoda | Zygentoma        | Libellulidae        |
| FN222978                               | Prip        | Bristletail                     | <i>Lepismachilis y-signata</i>      | Hexapoda | Archaeognatha    | Machilidae          |
| GAUM01020136                           | Prip        | Bristletail                     | <i>Machilis hrabei</i>              | Hexapoda | Archaeognatha    | Machilidae          |
| GAUG01033311                           | Prip        | Bristletail                     | <i>Meinertella cundinamarcensis</i> | Hexapoda | Archaeognatha    | Meinertellidae      |
| GAYN01007080                           | Prip 1      | Campodea                        | <i>Campodea augens</i>              | Hexapoda | Diplura          | Campodeidae         |
| GAYN01144154                           | Prip 2      | Campodea                        | <i>Campodea augens</i>              | Hexapoda | Diplura          | Campodeidae         |
| GAXJ01007613                           | Prip 1      | Two-pronged bristletail         | <i>Occasjapyx japonicus</i>         | Hexapoda | Diplura          | Japygidae           |
| GAXJ01010312                           | Prip 2      | Two-pronged bristletail         | <i>Occasjapyx japonicus</i>         | Hexapoda | Diplura          | Japygidae           |
| GAXJ01010770                           | Prip 3      | Two-pronged bristletail         | <i>Occasjapyx japonicus</i>         | Hexapoda | Diplura          | Japygidae           |
| GAXJ01101258                           | Prip 4      | Two-pronged bristletail         | <i>Occasjapyx japonicus</i>         | Hexapoda | Diplura          | Japygidae           |
| GAMM01012413/GAMM01012414              | Prip -like1 | Springtail                      | <i>Orchesella cincta</i>            | Hexapoda | Collembola       | Entomobryidae       |
| GAMM01010822                           | Prip -like2 | Springtail                      | <i>Orchesella cincta</i>            | Hexapoda | Collembola       | Entomobryidae       |
| GAMM01009287                           | Prip -like3 | Springtail                      | <i>Orchesella cincta</i>            | Hexapoda | Collembola       | Entomobryidae       |
| GAMM01008708                           | Prip -like1 | Springtail                      | <i>Folsomia candida</i>             | Hexapoda | Collembola       | Isotomidae          |
| GAMN01012115/GAMN01012753              | Prip -like2 | Springtail                      | <i>Folsomia candida</i>             | Hexapoda | Collembola       | Isotomidae          |
| sb_005_09119                           | Prip -like1 | Springtail                      | <i>Megaphorura arctica</i>          | Hexapoda | Collembola       | Onychiuridae        |
| EW748629                               | Prip -like2 | Springtail                      | <i>Megaphorura arctica</i>          | Hexapoda | Collembola       | Onychiuridae        |
| GATZ01003502                           | Prip -like1 | Clover springtail               | <i>Sminthurus viridis</i>           | Hexapoda | Collembola       | Sminthuridae        |
| GATZ01016023                           | Prip -like2 | Clover springtail               | <i>Sminthurus viridis</i>           | Hexapoda | Collembola       | Sminthuridae        |
| GATZ01103627                           | Prip -like3 | Clover springtail               | <i>Sminthurus viridis</i>           | Hexapoda | Collembola       | Sminthuridae        |
| GAUE01008782                           | Prip -like1 | Cosmopolitan springtail         | <i>Anurida maritima</i>             | Hexapoda | Collembola       | Neanuridae          |
| GAUE01009121                           | Prip -like2 | Cosmopolitan springtail         | <i>Anurida maritima</i>             | Hexapoda | Collembola       | Neanuridae          |
| GAUE01052561                           | Prip -like3 | Cosmopolitan springtail         | <i>Anurida maritima</i>             | Hexapoda | Collembola       | Neanuridae          |
| GAXI01003818                           | Prip -like1 | Giant springtail                | <i>Tetradontophora bielanensis</i>  | Hexapoda | Collembola       | Onychiuridae        |
| GAXI01003820                           | Prip -like2 | Giant springtail                | <i>Tetradontophora bielanensis</i>  | Hexapoda | Collembola       | Onychiuridae        |
| GAXI01020146                           | Prip -like3 | Giant springtail                | <i>Tetradontophora bielanensis</i>  | Hexapoda | Collembola       | Onychiuridae        |
| GATD01009723                           | Prip -like1 | Springtail                      | <i>Pogonognathellus sp.</i>         | Hexapoda | Collembola       | Tomoceridae         |

|                            |                   |                                     |                                     |              |                   |                |
|----------------------------|-------------------|-------------------------------------|-------------------------------------|--------------|-------------------|----------------|
| GATD01010900               | Prip -like2       | Springtail                          | <i>Pogonognathellus sp.</i>         | Hexapoda     | Collembola        | Tomoceridae    |
| EV474850/EV478034          | Prip -like V-par  | Springtail                          | <i>Folsomia candida</i>             | Hexapoda     | Collembola        | Isotomidae     |
| GATZ01102432               | Prip -like I-par: | Clover springtail                   | <i>Sminthurus viridis</i>           | Hexapoda     | Collembola        | Sminthuridae   |
| GAUE01011057               | Prip -like I-par: | Cosmopolitan springtail             | <i>Anurida maritima</i>             | Hexapoda     | Collembola        | Neanuridae     |
| GAXI01015403               | Prip -like V-par  | Giant springtail                    | <i>Tetradontophora bielanensis</i>  | Hexapoda     | Collembola        | Onychiuridae   |
| GAXI01018099               | Prip -like I-par: | Giant springtail                    | <i>Tetradontophora bielanensis</i>  | Hexapoda     | Collembola        | Onychiuridae   |
| GATD01099700               | Prip -like I-par: | Springtail                          | <i>Pogonognathellus sp.</i>         | Hexapoda     | Collembola        | Tomoceridae    |
| GAXE01021065               | Prip -like1       | Conehead                            | <i>Acerentomon sp.</i>              | Hexapoda     | Protura           | Acerentomidae  |
| GAXE01011432               | Prip -like2       | Conehead                            | <i>Acerentomon sp.</i>              | Hexapoda     | Protura           | Acerentomidae  |
| AFFK01018906               | Prip -like        | Coastal European centipede          | <i>Strigamia maritima</i>           | Chilopoda    | Geophilomorpha    | Linotaeniidae  |
| AFFK01016279               | Prip -like        | Coastal European centipede          | <i>Strigamia maritima</i>           | Chilopoda    | Geophilomorpha    | Linotaeniidae  |
| AFFK01018906               | Prip -like        | Coastal European centipede          | <i>Strigamia maritima</i>           | Chilopoda    | Geophilomorpha    | Linotaeniidae  |
| AFFK01022706               | Prip -like        | Coastal European centipede          | <i>Strigamia maritima</i>           | Chilopoda    | Geophilomorpha    | Linotaeniidae  |
| AFFK01021957               | Prip -like        | Coastal European centipede          | <i>Strigamia maritima</i>           | Chilopoda    | Geophilomorpha    | Linotaeniidae  |
| AFFK01015980               | Prip -like        | Coastal European centipede          | <i>Strigamia maritima</i>           | Chilopoda    | Geophilomorpha    | Linotaeniidae  |
| AFFK01023535/AFFK01023534  | Prip -like        | Coastal European centipede          | <i>Strigamia maritima</i>           | Chilopoda    | Geophilomorpha    | Linotaeniidae  |
| AFFK01013572               | Prip -like        | Coastal European centipede          | <i>Strigamia maritima</i>           | Chilopoda    | Geophilomorpha    | Linotaeniidae  |
| AFFK01013572               | Prip -like        | Coastal European centipede          | <i>Strigamia maritima</i>           | Chilopoda    | Geophilomorpha    | Linotaeniidae  |
| AFFK01013573               | Prip -like        | Coastal European centipede          | <i>Strigamia maritima</i>           | Chilopoda    | Geophilomorpha    | Linotaeniidae  |
| AFFK01013573               | Prip -like        | Coastal European centipede          | <i>Strigamia maritima</i>           | Chilopoda    | Geophilomorpha    | Linotaeniidae  |
| AFFK01013573               | Prip -like        | Coastal European centipede          | <i>Strigamia maritima</i>           | Chilopoda    | Geophilomorpha    | Linotaeniidae  |
| GAFS01003350               | Prip -like        | Narrow-clawed crayfish              | <i>Pontastacus leptodactylus</i>    | Malacostraca | Decapoda          | Astacidae      |
| AET34919                   | Prip -like        | Giant freshwater prawn              | <i>Macrobrachium rosenbergii</i>    | Malacostraca | Decapoda          | Palaemonidae   |
| AEI25531                   | Prip -like        | Black tiger shrimp                  | <i>Penaeus monodon</i>              | Malacostraca | Decapoda          | Penaëidae      |
| FE136953/JP420962/FE081160 | Prip -like        | Pacific white shrimp                | <i>Litopenaeus vannamei</i>         | Malacostraca | Decapoda          | Penaëidae      |
| FD699313                   | Prip -like        | American lobster                    | <i>Homarus americanus</i>           | Malacostraca | Decapoda          | Nephropidae    |
| JQ970426                   | Prip -like        | Blue crab                           | <i>Callinectes sapidus</i>          | Malacostraca | Decapoda          | Portunidae     |
| GT562677                   | Prip -like        | Swimming crab                       | <i>Portunus triburcularatus</i>     | Malacostraca | Decapoda          | Portunidae     |
| GAKD01017822               | Prip -like        | Amphipod                            | <i>Melita plumulosa</i>             | Malacostraca | Amphipoda         | Melitidae      |
| JL195955                   | Prip -like        | Remipede                            | <i>Speleonectes cf. tulumensis</i>  | Remipedia    | Nectipoda         | Speleonectidae |
| ACO10737                   | Prip -like        | Caligid copepod                     | <i>Caligus rogercresseyi</i>        | Maxillopoda  | Siphonostomatoida | Caligidae      |
| GO416492                   | Prip -like        | Cod worm                            | <i>Lernaeocera branchialis</i>      | Maxillopoda  | Siphonostomatoida | Pennellidae    |
| JV192099                   | Prip -like        | Tide pool copepod                   | <i>Tigriopus californicus</i>       | Maxillopoda  | Harpacticoida     | Harpacticidae  |
| EFX74648                   | Prip -like        | Common water flea                   | <i>Daphnia pulex</i>                | Branchiopoda | Diplostraca       | Daphniidae     |
| GACK01000433               | Prip -like        | Zebra tick                          | <i>Rhipicephalus pulchellus</i>     | Acari        | Ixodida           | Rhixodidae     |
| ADDG01009295/ADDG01028715  | Prip -like        | Honeybee mite                       | <i>Varroa destructor</i>            | Acari        | Mesostigmata      | Varroidae      |
| XP_003740496               | Prip -like        | Western predatory mite              | <i>Metaseiulus occidentalis</i>     | Acari        | Mesostigmata      | Phytoseiidae   |
| JR695181                   | Prip -like        | Two-spotted spider mite             | <i>Tetranychus urticae</i>          | Acari        | Acariformes       | Tetranychidae  |
| JT045087                   | Prip -like1       | African social eresid spider        | <i>Stegodyphus tentoriicola</i>     | Arachnida    | Araneae           | Eresidae       |
| GAZR01012136/JT037476      | Prip -like1       | African social eresid spider        | <i>Stegodyphus mimosarum</i>        | Arachnida    | Araneae           | Eresidae       |
| AOMJ01121993               | Prip -like1       | Common house spider                 | <i>Parasteatoda tepidariorum</i>    | Arachnida    | Araneae           | Theridiidae    |
| GAZS01059885               | Prip -like1       | Brazilian giant whiteknee tarantula | <i>Acanthoscurria geniculata</i>    | Arachnida    | Araneae           | Theraphosidae  |
| JA92966                    | Prip -like2       | American wandering spider           | <i>Cupiennius salei</i>             | Arachnida    | Araneae           | Theridiidae    |
| GANL01009509               | Prip -like2       | Black widow                         | <i>Latrodectus tredecimguttatus</i> | Arachnida    | Araneae           | Theridiidae    |
| GBCS01013355               | Prip -like2       | Western black widow                 | <i>Latrodectus hesperus</i>         | Arachnida    | Araneae           | Theridiidae    |
| AOMJ01225662/AOMJ01225654  | Prip -like2       | Common house spider                 | <i>Parasteatoda tepidariorum</i>    | Arachnida    | Araneae           | Theridiidae    |
| DR443206                   | Prip -like2       | São paulo black tarantula           | <i>Acanthoscurria gomesiana</i>     | Arachnida    | Araneae           | Theraphosidae  |
| GAZS01036184               | Prip -like2       | Brazilian giant whiteknee tarantula | <i>Acanthoscurria geniculata</i>    | Arachnida    | Araneae           | Theraphosidae  |
| AYEL01066910/AYEL01075601  | Prip -like1       | Chinese scorpion                    | <i>Mesobuthus martensii</i>         | Arachnida    | Scorpiones        | Buthidae       |
| AXZ01136975/AYEL01075601   | Prip -like1       | Baja California bark scorpion       | <i>Centruroides exilicauda</i>      | Arachnida    | Scorpiones        | Buthidae       |
| AYEL01052592               | Prip -like2       | Chinese scorpion                    | <i>Mesobuthus martensii</i>         | Arachnida    | Scorpiones        | Buthidae       |
| AXZ01008908                | Prip -like2       | Baja California bark scorpion       | <i>Centruroides exilicauda</i>      | Arachnida    | Scorpiones        | Buthidae       |
| AYEL01088164               | Prip -like3       | Chinese scorpion                    | <i>Mesobuthus martensii</i>         | Arachnida    | Scorpiones        | Buthidae       |
| AXZ01127083                | Prip -like3       | Baja California bark scorpion       | <i>Centruroides exilicauda</i>      | Arachnida    | Scorpiones        | Buthidae       |

#### Hexapoda unclassified

|                           |         |                          |                                     |          |         |               |
|---------------------------|---------|--------------------------|-------------------------------------|----------|---------|---------------|
| FBpp0072014               | Egfp 4  | Fruit fly                | <i>Drosophila melanogaster</i>      | Hexapoda | Diptera | Drosophilidae |
| FBpp0196999               | Egfp 4  | Fruit fly                | <i>Drosophila sechellia</i>         | Hexapoda | Diptera | Drosophilidae |
| FBpp0223428               | Egfp 4  | Fruit fly                | <i>Drosophila simulans</i>          | Hexapoda | Diptera | Drosophilidae |
| FBpp0256556               | Egfp 4  | Fruit fly                | <i>Drosophila yakuba</i>            | Hexapoda | Diptera | Drosophilidae |
| FBpp0138556               | Egfp 4  | Fruit fly                | <i>Drosophila erecta</i>            | Hexapoda | Diptera | Drosophilidae |
| FBpp0115022               | Egfp 4  | Fruit fly                | <i>Drosophila ananassae</i>         | Hexapoda | Diptera | Drosophilidae |
| FBpp0278011               | Egfp 4  | Fruit fly                | <i>Drosophila pseudoobscura</i>     | Hexapoda | Diptera | Drosophilidae |
| FBpp0181703               | Egfp 4  | Fruit fly                | <i>Drosophila persimilis</i>        | Hexapoda | Diptera | Drosophilidae |
| FBpp0236772               | Egfp 4  | Fruit fly                | <i>Drosophila virilis</i>           | Hexapoda | Diptera | Drosophilidae |
| FBpp0169721               | Egfp 4  | Fruit fly                | <i>Drosophila mojavensis</i>        | Hexapoda | Diptera | Drosophilidae |
| FBpp0155125               | Egfp 4  | Fruit fly                | <i>Drosophila grimshawi</i>         | Hexapoda | Diptera | Drosophilidae |
| FBpp0252317               | Egfp 4  | Fruit fly                | <i>Drosophila willistoni</i>        | Hexapoda | Diptera | Drosophilidae |
| EZ127051                  | Egfp 4  | Apple maggot             | <i>Rhagoletis pomonella</i>         | Hexapoda | Diptera | Tephritidae   |
| GAKB01002522              | Egfp 4a | Olive fruit fly          | <i>Bactrocera oleae</i>             | Hexapoda | Diptera | Tephritidae   |
| GAKB01004245              | Egfp 4b | Olive fruit fly          | <i>Bactrocera oleae</i>             | Hexapoda | Diptera | Tephritidae   |
| GAKB01003899              | Egfp 4c | Olive fruit fly          | <i>Bactrocera oleae</i>             | Hexapoda | Diptera | Tephritidae   |
| ACT34033                  | Egfp 4  | Goldenrod gall fly       | <i>Eurosta solidaginis</i>          | Hexapoda | Diptera | Tephritidae   |
| XM_004522562              | Egfp 4  | Mediterranean fruit fly  | <i>Ceratitis capitata</i>           | Hexapoda | Diptera | Tephritidae   |
| JG419371                  | Egfp 4  | Australian sheep blowfly | <i>Lucilia cuprina</i>              | Hexapoda | Diptera | Calliphoridae |
| FG295968/FG298919         | Egfp 4  | Primary screw-worm       | <i>Cochliomyia hominivorax</i>      | Hexapoda | Diptera | Calliphoridae |
| EZ597305                  | Egfp 4  | Flesh fly                | <i>Sarcophaga crassipalpis</i>      | Hexapoda | Diptera | Sarcophagidae |
| FD460504                  | Egfp 4  | Horn fly                 | <i>Haematobia irritans irritans</i> | Hexapoda | Diptera | Muscidae      |
| AQPM01070455/XP_005183005 | Egfp 4a | House fly                | <i>Musca domestica</i>              | Hexapoda | Diptera | Muscidae      |
| AQPM01070459              | Egfp 4b | House fly                | <i>Musca domestica</i>              | Hexapoda | Diptera | Muscidae      |
| FBpp0072015               | Egfp 3  | Fruit fly                | <i>Drosophila melanogaster</i>      | Hexapoda | Diptera | Drosophilidae |
| FBpp0197000               | Egfp 3  | Fruit fly                | <i>Drosophila sechellia</i>         | Hexapoda | Diptera | Drosophilidae |
| FBpp0223429               | Egfp 3  | Fruit fly                | <i>Drosophila simulans</i>          | Hexapoda | Diptera | Drosophilidae |
| FBpp0256558               | Egfp 3  | Fruit fly                | <i>Drosophila yakuba</i>            | Hexapoda | Diptera | Drosophilidae |
| FBpp0138557               | Egfp 3  | Fruit fly                | <i>Drosophila erecta</i>            | Hexapoda | Diptera | Drosophilidae |
| FBpp0115023               | Egfp 3  | Fruit fly                | <i>Drosophila ananassae</i>         | Hexapoda | Diptera | Drosophilidae |
| FBpp0278012               | Egfp 3  | Fruit fly                | <i>Drosophila pseudoobscura</i>     | Hexapoda | Diptera | Drosophilidae |
| FBpp0181704               | Egfp 3  | Fruit fly                | <i>Drosophila persimilis</i>        | Hexapoda | Diptera | Drosophilidae |
| FBpp0169722               | Egfp 3  | Fruit fly                | <i>Drosophila mojavensis</i>        | Hexapoda | Diptera | Drosophilidae |
| FBpp0155126               | Egfp 3  | Fruit fly                | <i>Drosophila grimshawi</i>         | Hexapoda | Diptera | Drosophilidae |
| FBpp0252320               | Egfp 3  | Fruit fly                | <i>Drosophila willistoni</i>        | Hexapoda | Diptera | Drosophilidae |
| FBpp0072016               | Egfp 2  | Fruit fly                | <i>Drosophila melanogaster</i>      | Hexapoda | Diptera | Drosophilidae |
| FBpp0197001               | Egfp 2  | Fruit fly                | <i>Drosophila sechellia</i>         | Hexapoda | Diptera | Drosophilidae |
| FBpp0223430               | Egfp 2  | Fruit fly                | <i>Drosophila simulans</i>          | Hexapoda | Diptera | Drosophilidae |
| FBpp0256559               | Egfp 2  | Fruit fly                | <i>Drosophila yakuba</i>            | Hexapoda | Diptera | Drosophilidae |
| FBpp0138558               | Egfp 2  | Fruit fly                | <i>Drosophila erecta</i>            | Hexapoda | Diptera | Drosophilidae |
| FBpp0115024               | Egfp 2  | Fruit fly                | <i>Drosophila ananassae</i>         | Hexapoda | Diptera | Drosophilidae |
| FBpp0278013               | Egfp 2  | Fruit fly                | <i>Drosophila pseudoobscura</i>     | Hexapoda | Diptera | Drosophilidae |
| FBpp0181705               | Egfp 2  | Fruit fly                | <i>Drosophila persimilis</i>        | Hexapoda | Diptera | Drosophilidae |
| FBpp0236774               | Egfp 2  | Fruit fly                | <i>Drosophila virilis</i>           | Hexapoda | Diptera | Drosophilidae |

|                                        |         |                                 |                                       |          |              |                |
|----------------------------------------|---------|---------------------------------|---------------------------------------|----------|--------------|----------------|
| FBpp0155127                            | Egpl 2  | Fruit fly                       | <i>Drosophila grimshawi</i>           | Hexapoda | Diptera      | Drosophilidae  |
| FBpp0252321                            | Egpl 2  | Fruit fly                       | <i>Drosophila willistoni</i>          | Hexapoda | Diptera      | Drosophilidae  |
| AFP49896                               | Egpl 2a | Tsetse fly                      | <i>Glossina morsitans morsitans</i>   | Hexapoda | Diptera      | Glossinidae    |
| ADD19418                               | Egpl 2b | Tsetse fly                      | <i>Glossina morsitans morsitans</i>   | Hexapoda | Diptera      | Glossinidae    |
| AFP49898                               | Egpl 2c | Tsetse fly                      | <i>Glossina morsitans morsitans</i>   | Hexapoda | Diptera      | Glossinidae    |
| ADD18960                               | Egpl 2d | Tsetse fly                      | <i>Glossina morsitans morsitans</i>   | Hexapoda | Diptera      | Glossinidae    |
| AAEL005008/XP_001650169                | Egpl 2  | Yellow fever mosquito           | <i>Aedes aegypti</i>                  | Hexapoda | Diptera      | Culicidae      |
| JO854615                               | Egpl 2  | Asian tiger mosquito            | <i>Aedes albopictus</i>               | Hexapoda | Diptera      | Culicidae      |
| CPU009225                              | Egpl 2  | Southern house mosquito         | <i>Culex quinquefasciatus</i>         | Hexapoda | Diptera      | Culicidae      |
| AGAP010325                             | Egpl 2  | African malaria mosquito        | <i>Anopheles gambiae</i>              | Hexapoda | Diptera      | Culicidae      |
| E2975669                               | Egpl 2  | African malaria mosquito        | <i>Anopheles funestus</i>             | Hexapoda | Diptera      | Culicidae      |
| GAFE01000152                           | Egpl 2  | Indonesian malaria mosquito     | <i>Anopheles sinensis</i>             | Hexapoda | Diptera      | Culicidae      |
| GAMD01001135                           | Egpl 2  | South American malaria mosquito | <i>Anopheles aquasalis</i>            | Hexapoda | Diptera      | Culicidae      |
| BAF62091                               | Egpl 2  | Sleeping chironomid             | <i>Polypedilum vanderplanki</i>       | Hexapoda | Diptera      | Chironomidae   |
| GAAK01006050                           | Egpl 2  | Antarctic flightless midge      | <i>Belgica antarctica</i>             | Hexapoda | Diptera      | Chironomidae   |
| KA181130                               | Egpl 2  | Harlequin fly                   | <i>Chironomus riparius</i>            | Hexapoda | Diptera      | Chironomidae   |
| AEGA01025736                           | Egpl 2  | Hessian fly                     | <i>Mayetiola destructor</i>           | Hexapoda | Diptera      | Cecidomyiidae  |
| EZ406461                               | Egpl 2  | Hessian fly                     | <i>Mayetiola destructor</i>           | Hexapoda | Diptera      | Cecidomyiidae  |
| JP552203                               | Egpl 2  | Sand fly                        | <i>Phlebotomus papatasi</i>           | Hexapoda | Diptera      | Psychodidae    |
| FBpp0071980                            | Egpl 1  | Fruit fly                       | <i>Drosophila melanogaster</i>        | Hexapoda | Diptera      | Drosophilidae  |
| FBpp0259319                            | Egpl 1  | Fruit fly                       | <i>Drosophila yakuba</i>              | Hexapoda | Diptera      | Drosophilidae  |
| FBpp0141417                            | Egpl 1  | Fruit fly                       | <i>Drosophila erecta</i>              | Hexapoda | Diptera      | Drosophilidae  |
| FBpp0116260                            | Egpl 1  | Fruit fly                       | <i>Drosophila ananassae</i>           | Hexapoda | Diptera      | Drosophilidae  |
| FBpp0281368                            | Egpl 1  | Fruit fly                       | <i>Drosophila pseudoobscura</i>       | Hexapoda | Diptera      | Drosophilidae  |
| FBpp0185590                            | Egpl 1  | Fruit fly                       | <i>Drosophila persimilis</i>          | Hexapoda | Diptera      | Drosophilidae  |
| FBpp0234409                            | Egpl 1a | Fruit fly                       | <i>Drosophila virilis</i>             | Hexapoda | Diptera      | Drosophilidae  |
| FBpp0168243                            | Egpl 1a | Fruit fly                       | <i>Drosophila mojavensis</i>          | Hexapoda | Diptera      | Drosophilidae  |
| FBpp0154569                            | Egpl 1a | Fruit fly                       | <i>Drosophila grimshawi</i>           | Hexapoda | Diptera      | Drosophilidae  |
| FBpp0252206                            | Egpl 1  | Fruit fly                       | <i>Drosophila willistoni</i>          | Hexapoda | Diptera      | Drosophilidae  |
| AAEL005001/XP_001650168                | Egpl 1  | Yellow fever mosquito           | <i>Aedes aegypti</i>                  | Hexapoda | Diptera      | Culicidae      |
| JO889430                               | Egpl 1  | Asian tiger mosquito            | <i>Aedes albopictus</i>               | Hexapoda | Diptera      | Culicidae      |
| CPIJ009224                             | Egpl 1  | Southern house mosquito         | <i>Culex quinquefasciatus</i>         | Hexapoda | Diptera      | Culicidae      |
| AGAP010326                             | Egpl 1  | African malaria mosquito        | <i>Anopheles gambiae</i>              | Hexapoda | Diptera      | Culicidae      |
| JP541300                               | Egpl 1  | Sand fly                        | <i>Phlebotomus papatasi</i>           | Hexapoda | Diptera      | Psychodidae    |
| GAAK01006051                           | Egpl 1a | Antarctic flightless midge      | <i>Belgica antarctica</i>             | Hexapoda | Diptera      | Chironomidae   |
| GAAK01006051                           | Egpl 1b | Antarctic flightless midge      | <i>Belgica antarctica</i>             | Hexapoda | Diptera      | Chironomidae   |
| AK383767                               | Egpl 1  | Domestic silkworm               | <i>Bombyx mori</i>                    | Hexapoda | Lepidoptera  | Bombycidae     |
| AB245966                               | Egpl 2  | Domestic silkworm               | <i>Bombyx mori</i>                    | Hexapoda | Lepidoptera  | Bombycidae     |
| CAEZ01006548                           | Egpl 1  | Postman butterfly               | <i>Heliconius melpomene melpomene</i> | Hexapoda | Lepidoptera  | Nymphalidae    |
| CAEZ01001062                           | Egpl 2  | Postman butterfly               | <i>Heliconius melpomene melpomene</i> | Hexapoda | Lepidoptera  | Nymphalidae    |
| CAEZ01001062                           | Egpl 3  | Postman butterfly               | <i>Heliconius melpomene melpomene</i> | Hexapoda | Lepidoptera  | Nymphalidae    |
| CAEZ01001062                           | Egpl 4  | Postman butterfly               | <i>Heliconius melpomene melpomene</i> | Hexapoda | Lepidoptera  | Nymphalidae    |
| EHJ72288                               | Egpl 1  | Monarch butterfly               | <i>Danaus plexippus</i>               | Hexapoda | Lepidoptera  | Nymphalidae    |
| EHJ65755                               | Egpl 2  | Monarch butterfly               | <i>Danaus plexippus</i>               | Hexapoda | Lepidoptera  | Nymphalidae    |
| EHJ78266                               | Egpl 3  | Monarch butterfly               | <i>Danaus plexippus</i>               | Hexapoda | Lepidoptera  | Nymphalidae    |
| EHJ72289                               | Egpl 4  | Monarch butterfly               | <i>Danaus plexippus</i>               | Hexapoda | Lepidoptera  | Nymphalidae    |
| E8823882                               | Egpl 2  | Indianmeal moth                 | <i>Plodia interpunctella</i>          | Hexapoda | Lepidoptera  | Pyrralidae     |
| JP717914                               | Egpl 2  | Asian Swallowtail               | <i>Papilio xuthus</i>                 | Hexapoda | Lepidoptera  | Papilionidae   |
| GAJS01025088                           | Egpl 1  | striped riceborer               | <i>Chilo suppressalis</i>             | Hexapoda | Lepidoptera  | Crambidae      |
| GAJS01070620                           | Egpl 2  | striped riceborer               | <i>Chilo suppressalis</i>             | Hexapoda | Lepidoptera  | Crambidae      |
| JP612965                               | Egpl 2  | Propertius duskywing            | <i>Erynnis propertius</i>             | Hexapoda | Lepidoptera  | Hesperiidae    |
| JO814913                               | Egpl 1  | Tobacco hornworm                | <i>Manduca sexta</i>                  | Hexapoda | Lepidoptera  | Sphingidae     |
| BAH47555                               | Egpl 1  | Oriental fruit moth             | <i>Grapholita molesta</i>             | Hexapoda | Lepidoptera  | Tortricidae    |
| TC014278                               | Egpl 4  | Red flour Beetle                | <i>Tribolium castaneum</i>            | Hexapoda | Coleoptera   | Tenebrionidae  |
| TC014279                               | Egpl 3  | Red flour Beetle                | <i>Tribolium castaneum</i>            | Hexapoda | Coleoptera   | Tenebrionidae  |
| TC014280                               | Egpl 2  | Red flour Beetle                | <i>Tribolium castaneum</i>            | Hexapoda | Coleoptera   | Tenebrionidae  |
| TC014281                               | Egpl 1  | Red flour Beetle                | <i>Tribolium castaneum</i>            | Hexapoda | Coleoptera   | Tenebrionidae  |
| GAFI01017518                           | Egpl 1  | Southern pine beetle            | <i>Dendroctonus frontalis</i>         | Hexapoda | Coleoptera   | Curculionidae  |
| GACR01006542                           | Egpl 1  | European spruce bark beetle     | <i>Ips typographus</i>                | Hexapoda | Coleoptera   | Curculionidae  |
| AEE61512                               | Egpl 1  | Mountain pine weevil            | <i>Dendroctonus ponderosae</i>        | Hexapoda | Coleoptera   | Curculionidae  |
| JU408487                               | Egpl 1  | Salt marsh beetle               | <i>Pogonus chalcus</i>                | Hexapoda | Coleoptera   | Carabidae      |
| GAXW01009218                           | Egpl    | Antlion                         | <i>Euroleon nostras</i>               | Hexapoda | Neoptera     | Myrmeleontidae |
| GAVV01181849                           | Egpl 1  | Green lacewing                  | <i>Pseudomallada prasinus</i>         | Hexapoda | Neoptera     | Chrysopidae    |
| GAVV01166415                           | Egpl 2  | Green lacewing                  | <i>Pseudomallada prasinus</i>         | Hexapoda | Neoptera     | Chrysopidae    |
| XP_003403182                           | Egpl 3  | Buff-tailed bumblebee           | <i>Bombus terrestris</i>              | Hexapoda | Hymenoptera  | Apidae         |
| XP_003486426                           | Egpl 3  | Common eastern bumble bee       | <i>Bombus impatiens</i>               | Hexapoda | Hymenoptera  | Apidae         |
| XP_624194                              | Egpl 3  | Honey bee                       | <i>Apis mellifera</i>                 | Hexapoda | Hymenoptera  | Apidae         |
| GAGH01067111                           | Egpl 3  | Mason bee                       | <i>Osmia cornuta</i>                  | Hexapoda | Hymenoptera  | Megachilidae   |
| XP_003702537                           | Egpl 3  | Alfalfa leafcutting bee         | <i>Megachile rotundata</i>            | Hexapoda | Hymenoptera  | Megachilidae   |
| EGI59562                               | Egpl 3  | Panamanian leafcutter ant       | <i>Acromyrmex echinatior</i>          | Hexapoda | Hymenoptera  | Formicidae     |
| EFN68166                               | Egpl 3  | Florida carpenter ant           | <i>Camponotus floridanus</i>          | Hexapoda | Hymenoptera  | Formicidae     |
| EFN76752                               | Egpl 3  | Jerdon's jumping ant            | <i>Harpegnathos saltator</i>          | Hexapoda | Hymenoptera  | Formicidae     |
| ACEP_00012182                          | Egpl 3  | Leafcutter ant                  | <i>Atta cephalotes</i>                | Hexapoda | Hymenoptera  | Formicidae     |
| XP_001601253                           | Egpl 3  | Jewel wasp                      | <i>Nasonia vitripennis</i>            | Hexapoda | Hymenoptera  | Pteromalidae   |
| ADA001239456/ADA001239457/ADA001239458 | Egpl 3  | Jewel wasp                      | <i>Nasonia giraulti</i>               | Hexapoda | Hymenoptera  | Pteromalidae   |
| XP_003403164                           | Egpl 2  | Buff-tailed bumblebee           | <i>Bombus terrestris</i>              | Hexapoda | Hymenoptera  | Apidae         |
| XP_003486425                           | Egpl 2  | Common eastern bumble bee       | <i>Bombus impatiens</i>               | Hexapoda | Hymenoptera  | Apidae         |
| XP_001121899                           | Egpl 2  | Honey bee                       | <i>Apis mellifera</i>                 | Hexapoda | Hymenoptera  | Apidae         |
| XP_003702536                           | Egpl 2  | Alfalfa leafcutting bee         | <i>Megachile rotundata</i>            | Hexapoda | Hymenoptera  | Megachilidae   |
| EGI59563                               | Egpl 2  | Panamanian leafcutter ant       | <i>Acromyrmex echinatior</i>          | Hexapoda | Hymenoptera  | Formicidae     |
| EFZ21244                               | Egpl 2  | Red fire ant                    | <i>Solenopsis invicta</i>             | Hexapoda | Hymenoptera  | Formicidae     |
| ACEP_00012181                          | Egpl 2  | Leafcutter ant                  | <i>Atta cephalotes</i>                | Hexapoda | Hymenoptera  | Formicidae     |
| XP_001601231                           | Egpl 2  | Jewel wasp                      | <i>Nasonia vitripennis</i>            | Hexapoda | Hymenoptera  | Pteromalidae   |
| ADA001239444                           | Egpl 2  | Jewel wasp                      | <i>Nasonia giraulti</i>               | Hexapoda | Hymenoptera  | Pteromalidae   |
| XP_003393900                           | Egpl 1  | Buff-tailed bumblebee           | <i>Bombus terrestris</i>              | Hexapoda | Hymenoptera  | Apidae         |
| XP_003484555                           | Egpl 1  | Common eastern bumble bee       | <i>Bombus impatiens</i>               | Hexapoda | Hymenoptera  | Apidae         |
| XP_001121043                           | Egpl 1  | Honey bee                       | <i>Apis mellifera</i>                 | Hexapoda | Hymenoptera  | Apidae         |
| XP_003702536                           | Egpl 1  | Alfalfa leafcutting bee         | <i>Megachile rotundata</i>            | Hexapoda | Hymenoptera  | Megachilidae   |
| EGI63170                               | Egpl 1  | Panamanian leafcutter ant       | <i>Acromyrmex echinatior</i>          | Hexapoda | Hymenoptera  | Formicidae     |
| EFN67363                               | Egpl 1  | Florida carpenter ant           | <i>Camponotus floridanus</i>          | Hexapoda | Hymenoptera  | Formicidae     |
| XP_001603421                           | Egpl 1  | Jewel wasp                      | <i>Nasonia vitripennis</i>            | Hexapoda | Hymenoptera  | Pteromalidae   |
| ADA001181999                           | Egpl 1  | Jewel wasp                      | <i>Nasonia giraulti</i>               | Hexapoda | Hymenoptera  | Pteromalidae   |
| PHUM474700                             | Egpl 2  | Human body louse                | <i>Pediculus humanus corporis</i>     | Hexapoda | Phthiraptera | Pediculidae    |
| PHUM369010                             | Egpl 1  | Human body louse                | <i>Pediculus humanus corporis</i>     | Hexapoda | Phthiraptera | Pediculidae    |
| GAWR01092467                           | Egpl 1  | Poultry shaft louse             | <i>Menopon gallinae</i>               | Hexapoda | Phthiraptera | Menoponidae    |
| GAWR01093370                           | Egpl 2  | Poultry shaft louse             | <i>Menopon gallinae</i>               | Hexapoda | Phthiraptera | Menoponidae    |
| GAWR01009252                           | Egpl 3  | Poultry shaft louse             | <i>Menopon gallinae</i>               | Hexapoda | Phthiraptera | Menoponidae    |
| GAWR01011369                           | Egpl 4  | Poultry shaft louse             | <i>Menopon gallinae</i>               | Hexapoda | Phthiraptera | Menoponidae    |
| GAYV01019679                           | Egpl 1  | Booklice                        | <i>Liposcelis bostrychophila</i>      | Hexapoda | Psocoptera   | Liposcelidae   |

|                            |           |                                 |                                      |          |                  |                     |
|----------------------------|-----------|---------------------------------|--------------------------------------|----------|------------------|---------------------|
| GAYV01019146               | Egfp 2    | Booklice                        | <i>Liposcelis bostrychophila</i>     | Hexapoda | Psocoptera       | Liposcelidae        |
| GAPT01001679               | Egfp 1    | Booklice                        | <i>Ectopsocus briggsi</i>            | Hexapoda | Psocoptera       | Ectopsocidae        |
| GAPT01090202               | Egfp 2    | Booklice                        | <i>Ectopsocus briggsi</i>            | Hexapoda | Psocoptera       | Ectopsocidae        |
| GAXD01000016               | Egfp      | Western flower thrips           | <i>Frankliniella occidentalis</i>    | Hexapoda | Thysanoptera     | Thripidae           |
| GAJY01002108               | Egfp      | Cowpea flower thrips            | <i>Megalurothrips sjostedti</i>      | Hexapoda | Thysanoptera     | Thripidae           |
| CAC13959/AEV57515/AEV57516 | Egfp      | Assassin bug                    | <i>Rhodnius prolixus</i>             | Hexapoda | Hemiptera        | Reduviidae          |
| KF048098                   | Egfp 1    | Lygus bug                       | <i>Lygus hesperus</i>                | Hexapoda | Hemiptera        | Miridae             |
| KF048093                   | Egfp 2A   | Lygus bug                       | <i>Lygus hesperus</i>                | Hexapoda | Hemiptera        | Miridae             |
| KF048094                   | Egfp 2B   | Lygus bug                       | <i>Lygus hesperus</i>                | Hexapoda | Hemiptera        | Miridae             |
| KF048095                   | Egfp 2C   | Lygus bug                       | <i>Lygus hesperus</i>                | Hexapoda | Hemiptera        | Miridae             |
| KF048096                   | Egfp 2D   | Lygus bug                       | <i>Lygus hesperus</i>                | Hexapoda | Hemiptera        | Miridae             |
| KF048097                   | Egfp 2E   | Lygus bug                       | <i>Lygus hesperus</i>                | Hexapoda | Hemiptera        | Miridae             |
| XP_001952198               | Egfp      | Pea aphid                       | <i>Acyrtosiphon pisum</i>            | Hexapoda | Hemiptera        | Aphididae           |
| F0032683                   | Egfp      | Shallot aphid                   | <i>Myzus ascalonicus</i>             | Hexapoda | Hemiptera        | Aphididae           |
| GAOM01002305               | Egfp      | Potato aphid                    | <i>Macrosiphum euphorbiae</i>        | Hexapoda | Hemiptera        | Aphididae           |
| GW522658                   | Egfp      | Cotton aphid                    | <i>Aphis gossypii</i>                | Hexapoda | Hemiptera        | Aphididae           |
| AHB86603                   | Egfp      | Potato psyllid                  | <i>Bactericera cockerelli</i>        | Hexapoda | Hemiptera        | Triozidae           |
| AHB86602                   | Egfp      | Potato psyllid                  | <i>Bactericera cockerelli</i>        | Hexapoda | Hemiptera        | Triozidae           |
| AHB86601                   | Egfp      | Potato psyllid                  | <i>Bactericera cockerelli</i>        | Hexapoda | Hemiptera        | Triozidae           |
| XP_008487274               | Egfp      | Potato psyllid                  | <i>Bactericera cockerelli</i>        | Hexapoda | Hemiptera        | Triozidae           |
| GACJ01000325               | Egfp      | Asian citrus psyllid            | <i>Diaphorina citri</i>              | Hexapoda | Hemiptera        | Psyllidae           |
| HP650016                   | Egfp 1    | Asian citrus psyllid            | <i>Diaphorina citri</i>              | Hexapoda | Hemiptera        | Psyllidae           |
| HP660290                   | Egfp 2    | Sweet potato whitefly           | <i>Bemisia tabaci</i>                | Hexapoda | Hemiptera        | Aleyrodidae         |
| GAJV01000737               | Egfp      | Sweet potato whitefly           | <i>Bemisia tabaci</i>                | Hexapoda | Hemiptera        | Aleyrodidae         |
| GAJX01000223               | Egfp      | Cowpea pod-sucking bug          | <i>Anoplocnemis curvipes</i>         | Hexapoda | Hemiptera        | Coreidae            |
| BAN21211                   | Egfp      | African pod bug                 | <i>Clavigralla tomentosicollis</i>   | Hexapoda | Hemiptera        | Coreidae            |
| GBID01002499               | Egfp      | Bean bug                        | <i>Riptortus pedestris</i>           | Hexapoda | Hemiptera        | Coreidae            |
| FG131060/GAWS01002503      | Egfp      | German cockroach                | <i>Blattella germanica</i>           | Hexapoda | Blattodea        | Ectobiidae          |
| GAYD01331798               | Egfp      | American cockroach              | <i>Periplaneta americana</i>         | Hexapoda | Blattodea        | Blattidae           |
| GAZN01202855               | Egfp 1    | Blaberus cockroach              | <i>Blaberus atropos</i>              | Hexapoda | Blattodea        | Blaberidae          |
| GAZN01196580               | Egfp 2    | Brown hooded cockroach          | <i>Cryptocercus wrighti</i>          | Hexapoda | Blattodea        | Cryptocercidae      |
| FX376451                   | Egfp      | Brown hooded cockroach          | <i>Cryptocercus wrighti</i>          | Hexapoda | Blattodea        | Cryptocercidae      |
| AUST01030857               | Egfp      | Wood-eating higher termite      | <i>Nasutitermes takasagoensis</i>    | Hexapoda | Isoptera         | Termitidae          |
| GASE01009002               | Egfp      | Nevada dampwood termite         | <i>Zootermopsis nevadensis</i>       | Hexapoda | Isoptera         | Termitidae          |
| FL640174/FL639044          | Egfp      | Cuban subterranean termite      | <i>Prohynchotermes simplex</i>       | Hexapoda | Isoptera         | Rhinotermitidae     |
| GATB01335234               | Egfp      | Eastern subterranean termite    | <i>Reticulitermes flavipes</i>       | Hexapoda | Isoptera         | Rhinotermitidae     |
| GASW01223743               | Egfp      | Metallic mantis                 | <i>Metallicus splendidus</i>         | Hexapoda | Mantodea         | Metallicidae        |
| GAYA01013920               | Egfp      | Praying mantis                  | <i>Mantis religiosa</i>              | Hexapoda | Mantodea         | Mantidae            |
| GAAX01017048               | Egfp      | Zoraptid                        | <i>Zorotypus caudelli</i>            | Hexapoda | Orthoptera       | Zorotypidae         |
| GAYL01128297               | Egfp      | European earwig                 | <i>Forficula auricularia</i>         | Hexapoda | Dermoptera       | Forficulidae        |
| GAUF01000114               | Egfp      | Stonefly                        | <i>Cosmioperla kuna</i>              | Hexapoda | Plecoptera       | Eustheniidae        |
| GATV01154381               | Egfp      | Leuctra                         | <i>Leuctra sp.</i>                   | Hexapoda | Plecoptera       | Leuctridae          |
| GAWU01009413               | Egfp      | Stonefly                        | <i>Perla marginata</i>               | Hexapoda | Plecoptera       | Perlidae            |
| GAWG01091169               | Egfp      | Webspinner                      | <i>Aposthonia japonica</i>           | Hexapoda | Embioptera       | Oligotomidae        |
| GAWE01075831               | Egfp      | Giant prickly stick insect      | <i>Extatosoma tiaratum</i>           | Hexapoda | Phasmatodea      | Phasmatidae         |
| GAWD01039255               | Egfp      | Vietnamese walking stick insect | <i>Ramulus artemis</i>               | Hexapoda | Phasmatodea      | Phasmatidae         |
| GAWF01050690               | Egfp      | Vietnamese walking stick        | <i>Medauroidea extrudentata</i>      | Hexapoda | Phasmatodea      | Phasmatidae         |
| GAWC01056573               | Egfp      | Pink winged stick insect        | <i>Sipyloidea sipyilus</i>           | Hexapoda | Phasmatodea      | Diapheromeridae     |
| GAXB01152638               | Egfp 1    | Thorny stick insect             | <i>Aretaon asperimus</i>             | Hexapoda | Phasmatodea      | Heteropterygidae    |
| GAXB01151664               | Egfp 2    | Heelwalker                      | <i>Tanzaniophasma sp.</i>            | Hexapoda | Mantophasmatodea | Tanzaniophasmatidae |
| AVCP010359984              | Egfp      | Heelwalker                      | <i>Tanzaniophasma sp.</i>            | Hexapoda | Mantophasmatodea | Tanzaniophasmatidae |
| GAZT01001309               | Egfp      | Migratory locust                | <i>Locusta migratoria</i>            | Hexapoda | Orthoptera       | Acrididae           |
| GBHB01072046               | Egfp      | False stick insect              | <i>Prosarthria teretirostris</i>     | Hexapoda | Orthoptera       | Proscopiidae        |
| GAIZ01015418               | Egfp      | Oceanic field cricket           | <i>Teleogryllus commodus</i>         | Hexapoda | Orthoptera       | Gryllidae           |
| GASQ01128632               | Egfp      | Sand field cricket              | <i>Gryllus firmus</i>                | Hexapoda | Orthoptera       | Gryllidae           |
| GAUZ01005949               | Egfp      | Slender Groundhopper            | <i>Tetrix subulata</i>               | Hexapoda | Orthoptera       | Tetrigidae          |
| GATU01013392               | Egfp      | Stripe-winged grasshopper       | <i>Stenobothrus lineatus</i>         | Hexapoda | Orthoptera       | Acrididae           |
| GATU01003749               | Egfp 1    | Blue-winged olive               | <i>Baetis sp.</i>                    | Hexapoda | Ephemeroptera    | Baetidae            |
| GAXA01012395               | Egfp 2    | Blue-winged olive               | <i>Baetis sp.</i>                    | Hexapoda | Ephemeroptera    | Baetidae            |
| GAZG01100517               | Egfp      | Mahogany Dun                    | <i>Isonychia bicolor</i>             | Hexapoda | Ephemeroptera    | Isonychiidae        |
| AYNC01028369               | Egfp      | Mayfly                          | <i>Eurylophella sp.</i>              | Hexapoda | Ephemeroptera    | Ephemerellidae      |
| GAYM01007100               | Egfp      | Green drake                     | <i>Ephemera danica</i>               | Hexapoda | Ephemeroptera    | Ephemeridae         |
| GAVW01007834               | Egfp      | Banded damoiselle               | <i>Calopteryx splendens</i>          | Hexapoda | Odonata          | Calopterygidae      |
| GAYO01001919               | Egfp      | Dragonfly                       | <i>Epiophlebia superstes</i>         | Hexapoda | Odonata          | Epiophlebiidae      |
| APVN01045462               | Egfp      | Golden-ringed dragonfly         | <i>Cordulegaster boltonii</i>        | Hexapoda | Odonata          | Cordulegastriidae   |
| GASN01409637               | Egfp      | Scarce chaser                   | <i>Ladona fulva</i>                  | Hexapoda | Odonata          | Libellulidae        |
| GAYJ01034252               | Egfp      | Firebrat                        | <i>Thermobia domestica</i>           | Hexapoda | Zygentoma        | Lepismatidae        |
| GAUM01182693               | Egfp      | Silverfish                      | <i>Atelura formicaria</i>            | Hexapoda | Zygentoma        | Nicoletiidae        |
| GAUG01034808               | Egfp      | Bristletail                     | <i>Machilis hrabei</i>               | Hexapoda | Archaeognatha    | Machilidae          |
| GAUM01024706               | Egfp      | Bristletail                     | <i>Meinertellus cundinamarcensis</i> | Hexapoda | Archaeognatha    | Meinertellidae      |
| GAUG01247769               | Egfp-like | Bristletail                     | <i>Machilis hrabei</i>               | Hexapoda | Archaeognatha    | Machilidae          |
| GAXE01013530               | Egfp-like | Bristletail                     | <i>Meinertellus cundinamarcensis</i> | Hexapoda | Archaeognatha    | Meinertellidae      |
| GAXE01015084               | Egfp-like | Conehead                        | <i>Acerentomon sp.</i>               | Hexapoda | Protura          | Acerentomidae       |
|                            | Egfp-like | S-par Conehead                  | <i>Acerentomon sp.</i>               | Hexapoda | Protura          | Acerentomidae       |

#### Arthropoda aquaglyceroporis

|                                                     |       |                                 |                                   |          |                  |                     |
|-----------------------------------------------------|-------|---------------------------------|-----------------------------------|----------|------------------|---------------------|
| XP_002430403                                        | Gfp   | Human body louse                | <i>Pediculus humanus corporis</i> | Hexapoda | Phthiraptera     | Pediculidae         |
| GAWR01093456                                        | Gfp   | Poultry shaft louse             | <i>Menopon gallinae</i>           | Hexapoda | Phthiraptera     | Menoponidae         |
| GAYV01015247                                        | Gfp 1 | Booklice                        | <i>Liposcelis bostrychophila</i>  | Hexapoda | Psocoptera       | Liposcelidae        |
| GAYV01015248                                        | Gfp 2 | Booklice                        | <i>Liposcelis bostrychophila</i>  | Hexapoda | Psocoptera       | Liposcelidae        |
| GAPT01019852                                        | Gfp   | Booklice                        | <i>Ectopsocus briggsi</i>         | Hexapoda | Psocoptera       | Ectopsocidae        |
| GAYA01037781                                        | Gfp   | Zoraptid                        | <i>Zorotypus caudelli</i>         | Hexapoda | Orthoptera       | Zorotypidae         |
| GABA01000698                                        | Gfp   | Zoraptid                        | <i>Zorotypus gurneyi</i>          | Hexapoda | Zoraptera        | Zorotypidae         |
| GAYQ01177068                                        | Gfp   | European earwig                 | <i>Forficula auricularia</i>      | Hexapoda | Dermoptera       | Forficulidae        |
| GAYL01081166                                        | Gfp   | Stonefly                        | <i>Cosmioperla kuna</i>           | Hexapoda | Plecoptera       | Eustheniidae        |
| GAUF01080011                                        | Gfp   | Leuctra                         | <i>Leuctra sp.</i>                | Hexapoda | Plecoptera       | Leuctridae          |
| GATV01110784                                        | Gfp   | Stonefly                        | <i>Perla marginata</i>            | Hexapoda | Plecoptera       | Perlidae            |
| GAWU01218234                                        | Gfp   | Webspinner                      | <i>Aposthonia japonica</i>        | Hexapoda | Embioptera       | Oligotomidae        |
| GAWG01068929                                        | Gfp   | Giant prickly stick insect      | <i>Extatosoma tiaratum</i>        | Hexapoda | Phasmatodea      | Phasmatidae         |
| GAWE01083837/GAWE01083816                           | Gfp   | Vietnamese walking stick insect | <i>Ramulus artemis</i>            | Hexapoda | Phasmatodea      | Phasmatidae         |
| GAWD01050986                                        | Gfp   | Vietnamese walking stick        | <i>Medauroidea extrudentata</i>   | Hexapoda | Phasmatodea      | Phasmatidae         |
| GAWF01020399/GAWF01096573/GAWF01024650/GAWF01024651 | Gfp   | Pink winged stick insect        | <i>Sipyloidea sipyilus</i>        | Hexapoda | Phasmatodea      | Diapheromeridae     |
| GAWC01056095                                        | Gfp   | Thorny stick insect             | <i>Aretaon asperimus</i>          | Hexapoda | Phasmatodea      | Heteropterygidae    |
| GAXB01138367                                        | Gfp   | Heelwalker                      | <i>Tanzaniophasma sp.</i>         | Hexapoda | Mantophasmatodea | Tanzaniophasmatidae |
| GAUX01277991                                        | Gfp   | Camel cricket                   | <i>Ceuthophilus sp.</i>           | Hexapoda | Orthoptera       | Rhaphidophoridae    |
| GAZT01142164                                        | Gfp   | False stick insect              | <i>Prosarthria teretirostris</i>  | Hexapoda | Orthoptera       | Proscopiidae        |
| GASQ01015062                                        | Gfp   | Slender Groundhopper            | <i>Tetrix subulata</i>            | Hexapoda | Orthoptera       | Tetrigidae          |
| GAUZ01006460                                        | Gfp   | Stripe-winged grasshopper       | <i>Stenobothrus lineatus</i>      | Hexapoda | Orthoptera       | Acrididae           |
| GATU01072356                                        | Gfp   | Blue-winged olive               | <i>Baetis sp.</i>                 | Hexapoda | Ephemeroptera    | Baetidae            |
| GAXA0113250                                         | Gfp   | Mahogany Dun                    | <i>Isonychia bicolor</i>          | Hexapoda | Ephemeroptera    | Isonychiidae        |



|                                                     |         |                                     |                                     |           |                |               |
|-----------------------------------------------------|---------|-------------------------------------|-------------------------------------|-----------|----------------|---------------|
| JAC35177                                            | Glp B1  | Rickettsia tick                     | <i>Amblyomma triste</i>             | Acari     | Ixodida        | Ixodidae      |
| JAC25752                                            | Glp B1  | Rickettsia tick                     | <i>Amblyomma parvum</i>             | Acari     | Ixodida        | Ixodidae      |
| JAC22662                                            | Glp B1  | Cayenne tick                        | <i>Amblyomma cajennense</i>         | Acari     | Ixodida        | Ixodidae      |
| GACK01008102                                        | Glp B1  | Zebra tick                          | <i>Rhipicephalus pulchellus</i>     | Acari     | Ixodida        | Ixodidae      |
| CAR66115                                            | Glp B1  | Brown dog tick                      | <i>Rhipicephalus sanguineus</i>     | Acari     | Ixodida        | Ixodidae      |
| CD780384                                            | Glp B1  | Brown ear tick                      | <i>Rhipicephalus appendiculatus</i> | Acari     | Ixodida        | Ixodidae      |
| ABJB010086453/ABJB010131197/ABJB010002103           | Glp B2a | Blacklegged tick                    | <i>Ixodes scapularis</i>            | Acari     | Ixodida        | Ixodidae      |
| EEC04800                                            | Glp B2b | Blacklegged tick                    | <i>Ixodes scapularis</i>            | Acari     | Ixodida        | Ixodidae      |
| CAX48964                                            | Glp B2a | Castor bean tick                    | <i>Ixodes ricinus</i>               | Acari     | Ixodida        | Ixodidae      |
| JAA71533                                            | Glp B2b | Castor bean tick                    | <i>Ixodes ricinus</i>               | Acari     | Ixodida        | Ixodidae      |
| JAC32051                                            | Glp B2  | Rickettsia tick                     | <i>Amblyomma triste</i>             | Acari     | Ixodida        | Ixodidae      |
| JAC25679                                            | Glp B2  | Rickettsia tick                     | <i>Amblyomma parvum</i>             | Acari     | Ixodida        | Ixodidae      |
| JAC19979                                            | Glp B2  | Cayenne tick                        | <i>Amblyomma cajennense</i>         | Acari     | Ixodida        | Ixodidae      |
| JAC25782                                            | Glp B3  | Rickettsia tick                     | <i>Amblyomma parvum</i>             | Acari     | Ixodida        | Ixodidae      |
| JAC21377                                            | Glp B3  | Cayenne tick                        | <i>Amblyomma cajennense</i>         | Acari     | Ixodida        | Ixodidae      |
| GAGD01000711                                        | Glp B3  | Lone Star tick                      | <i>Amblyomma americanum</i>         | Acari     | Ixodida        | Ixodidae      |
| JAA56054                                            | Glp B3  | Zebra tick                          | <i>Rhipicephalus pulchellus</i>     | Acari     | Ixodida        | Ixodidae      |
| GADI01002277                                        | Glp B3  | Castor bean tick                    | <i>Ixodes ricinus</i>               | Acari     | Ixodida        | Ixodidae      |
| EEC20079                                            | Glp B3  | Blacklegged tick                    | <i>Ixodes scapularis</i>            | Acari     | Ixodida        | Ixodidae      |
| AB153034                                            | Glp B4  | American dog tick                   | <i>Dermacentor variabilis</i>       | Acari     | Ixodida        | Ixodidae      |
| CK190314/CK190314                                   | Glp B4  | Southern cattle tick                | <i>Rhipicephalus microplus</i>      | Acari     | Ixodida        | Ixodidae      |
| ABJB011072005/ABJB010219880                         | Glp B4  | Blacklegged tick                    | <i>Ixodes scapularis</i>            | Acari     | Ixodida        | Ixodidae      |
| GANL01004539                                        | Glp B   | Black widow                         | <i>Latrodectus tredecimguttatus</i> | Arachnida | Araneae        | Theridiidae   |
| GBCS01000276                                        | Glp B   | Western black widow                 | <i>Latrodectus hesperus</i>         | Arachnida | Araneae        | Theridiidae   |
| AOMJ01123248/AOMJ01123250/AOMJ01123251              | Glp B   | Common house spider                 | <i>Parasteatoda tepidarium</i>      | Arachnida | Araneae        | Theridiidae   |
| AOMJ01110087/AOMJ01110082/AOMJ01110081/AOMJ01110079 | Glp B   | Common house spider                 | <i>Parasteatoda tepidarium</i>      | Arachnida | Araneae        | Theridiidae   |
| GAZS01045747                                        | Glp B   | Brazilian giant whiteknee tarantula | <i>Acanthoscurria geniculata</i>    | Arachnida | Araneae        | Theraphosidae |
| tetur01g07330                                       | Glp B   | Two-spotted spider mite             | <i>Tetranychus urticae</i>          | Acari     | Eleutherengona | Tetranychidae |
| CAEY01001013/CAEY01001014                           | Glp B   | Two-spotted spider mite             | <i>Tetranychus urticae</i>          | Acari     | Eleutherengona | Tetranychidae |
| CAEY01001579                                        | Glp B   | Two-spotted spider mite             | <i>Tetranychus urticae</i>          | Acari     | Eleutherengona | Tetranychidae |
| JT037994                                            | Glp B   | African social eresid spider        | <i>Stegodyphus mimosarum</i>        | Arachnida | Araneae        | Eresidae      |
| JT030404                                            | Glp B   | African social eresid spider        | <i>Stegodyphus lineatus</i>         | Arachnida | Araneae        | Eresidae      |
| GBCS01013198                                        | Glp B   | Western black widow                 | <i>Latrodectus hesperus</i>         | Arachnida | Araneae        | Theridiidae   |
| AYEL01071210                                        | Glp B   | Chinese scorpion                    | <i>Mesobuthus martensii</i>         | Arachnida | Scorpiones     | Buthidae      |
| AXZI01007912/AXZI01007914/AXZI01007916              | Glp B   | Baja California bark scorpion       | <i>Centruroides exilicauda</i>      | Arachnida | Scorpiones     | Buthidae      |

#### Other Protosotomia aquaglyceroporins

|          |          |            |                              |            |          |             |
|----------|----------|------------|------------------------------|------------|----------|-------------|
| AEP14563 | Glp 9    | Water bear | <i>Milnesium tardigradum</i> | Tardigrada | Apochela | Milnesiidae |
| AEP14555 | Glp (1)  | Water bear | <i>Milnesium tardigradum</i> | Tardigrada | Apochela | Milnesiidae |
| AEP14558 | Glp (4)  | Water bear | <i>Milnesium tardigradum</i> | Tardigrada | Apochela | Milnesiidae |
| AEP14562 | Glp (8)  | Water bear | <i>Milnesium tardigradum</i> | Tardigrada | Apochela | Milnesiidae |
| AEP14556 | Glp (2)  | Water bear | <i>Milnesium tardigradum</i> | Tardigrada | Apochela | Milnesiidae |
| AEP14557 | Glp (3)  | Water bear | <i>Milnesium tardigradum</i> | Tardigrada | Apochela | Milnesiidae |
| AEP14564 | Glp (10) | Water bear | <i>Milnesium tardigradum</i> | Tardigrada | Apochela | Milnesiidae |
| AEP14561 | Glp (7)  | Water bear | <i>Milnesium tardigradum</i> | Tardigrada | Apochela | Milnesiidae |

#### Arthropoda unorthodox aquaporins

|                                        |         |                             |                                       |          |             |                |
|----------------------------------------|---------|-----------------------------|---------------------------------------|----------|-------------|----------------|
| FBpp0086879                            | Aqp 12L | Fruit fly                   | <i>Drosophila melanogaster</i>        | Hexapoda | Diptera     | Drosophilidae  |
| FBpp0201777                            | Aqp 12L | Fruit fly                   | <i>Drosophila sechellia</i>           | Hexapoda | Diptera     | Drosophilidae  |
| FBpp0258396                            | Aqp 12L | Fruit fly                   | <i>Drosophila yakuba</i>              | Hexapoda | Diptera     | Drosophilidae  |
| FBpp0141060                            | Aqp 12L | Fruit fly                   | <i>Drosophila erecta</i>              | Hexapoda | Diptera     | Drosophilidae  |
| FBpp0224314                            | Aqp 12L | Fruit fly                   | <i>Drosophila simulans</i>            | Hexapoda | Diptera     | Drosophilidae  |
| FBpp0116155                            | Aqp 12L | Fruit fly                   | <i>Drosophila ananassae</i>           | Hexapoda | Diptera     | Drosophilidae  |
| FBpp0276666                            | Aqp 12L | Fruit fly                   | <i>Drosophila pseudoobscura</i>       | Hexapoda | Diptera     | Drosophilidae  |
| FBpp0235888                            | Aqp 12L | Fruit fly                   | <i>Drosophila virilis</i>             | Hexapoda | Diptera     | Drosophilidae  |
| FBpp0167611                            | Aqp 12L | Fruit fly                   | <i>Drosophila mojavensis</i>          | Hexapoda | Diptera     | Drosophilidae  |
| FBpp0158826                            | Aqp 12L | Fruit fly                   | <i>Drosophila grimshawi</i>           | Hexapoda | Diptera     | Drosophilidae  |
| FBpp0247034                            | Aqp 12L | Fruit fly                   | <i>Drosophila willistoni</i>          | Hexapoda | Diptera     | Drosophilidae  |
| GAKB01003759                           | Aqp 12L | Olive fruit fly             | <i>Bactrocera oleae</i>               | Hexapoda | Diptera     | Tephritidae    |
| XP_004529905                           | Aqp 12L | Mediterranean fruit fly     | <i>Ceratitis capitata</i>             | Hexapoda | Diptera     | Tephritidae    |
| CAQQ02174372/CAQQ02174371/CAQQ02389937 | Aqp 12L | Scuttle fly                 | <i>Megasella scalaris</i>             | Hexapoda | Diptera     | Phoridae       |
| E2602043                               | Aqp 12L | Flesh fly                   | <i>Sarcophaga crassipalpis</i>        | Hexapoda | Diptera     | Sarcophagidae  |
| FD463879                               | Aqp 12L | Horn fly                    | <i>Haematobia irritans irritans</i>   | Hexapoda | Diptera     | Muscidae       |
| AQPM01092757                           | Aqp 12L | House fly                   | <i>Haematobia irritans irritans</i>   | Hexapoda | Diptera     | Muscidae       |
| AFP49900                               | Aqp 12L | Tsetse fly                  | <i>Glossina morsitans morsitans</i>   | Hexapoda | Diptera     | Glossiniidae   |
| AAEL014255/XP_001648046                | Aqp 12L | Yellow fever mosquito       | <i>Aedes aegypti</i>                  | Hexapoda | Diptera     | Culicidae      |
| CPJ004456                              | Aqp 12L | Southern house mosquito     | <i>Culex quinquefasciatus</i>         | Hexapoda | Diptera     | Culicidae      |
| AGAP010878                             | Aqp 12L | African malaria mosquito    | <i>Anopheles gambiae</i>              | Hexapoda | Diptera     | Culicidae      |
| E2978777                               | Aqp 12L | African malaria mosquito    | <i>Anopheles funestus</i>             | Hexapoda | Diptera     | Culicidae      |
| EFR26850                               | Aqp 12L | American malaria mosquito   | <i>Anopheles darlingi</i>             | Hexapoda | Diptera     | Culicidae      |
| GAFE01006687                           | Aqp 12L | Indonesian malaria mosquito | <i>Anopheles sinensis</i>             | Hexapoda | Diptera     | Culicidae      |
| GAAK01006945                           | Aqp 12L | Antarctic flightless midge  | <i>Belgica antarctica</i>             | Hexapoda | Diptera     | Chironomidae   |
| AEGA01009001/AEGA01031906              | Aqp 12L | Hessian fly                 | <i>Mayetiola destructor</i>           | Hexapoda | Diptera     | Cecidomyiidae  |
| JP551754                               | Aqp 12L | Sand fly                    | <i>Phlebotomus papatasi</i>           | Hexapoda | Diptera     | Psychodidae    |
| AM094572/AM094570                      | Aqp 12L | Sand fly                    | <i>Lutzomyia longipalpis</i>          | Hexapoda | Diptera     | Psychodidae    |
| HX266982                               | Aqp 12L | Domestic silkworm           | <i>Bombyx mori</i>                    | Hexapoda | Lepidoptera | Bombycidae     |
| CAEZ01010288                           | Aqp 12L | Postman butterfly           | <i>Heliconius melpomene melpomene</i> | Hexapoda | Lepidoptera | Nymphalidae    |
| EHJ69710                               | Aqp 12L | Monarch butterfly           | <i>Danaus plexippus</i>               | Hexapoda | Lepidoptera | Nymphalidae    |
| GAFU01002466                           | Aqp 12L | Beet armyworm               | <i>Spodoptera exigua</i>              | Hexapoda | Lepidoptera | Noctuidae      |
| GT199640/GT196938                      | Aqp 12L | Tobacco budworm             | <i>Heliothis virescens</i>            | Hexapoda | Lepidoptera | Noctuidae      |
| HS099242                               | Aqp 12L | Maruca pod borer            | <i>Maruca vitrata</i>                 | Hexapoda | Lepidoptera | Crambidae      |
| JP615554/JP615553                      | Aqp 12L | Propertius duskywing        | <i>Erynnis propertius</i>             | Hexapoda | Lepidoptera | Hesperiidae    |
| AIXA01009041                           | Aqp 12L | Tobacco hornworm            | <i>Manduca sexta</i>                  | Hexapoda | Lepidoptera | Sphingidae     |
| HS099242                               | Aqp 12L | Maruca pod borer            | <i>Maruca vitrata</i>                 | Hexapoda | Lepidoptera | Crambidae      |
| BAGR01006886/BAGR01078921/BAGR01078920 | Aqp 12L | Diamondback Moth            | <i>Plutella xylostella</i>            | Hexapoda | Lepidoptera | Plutellidae    |
| GAXW01087864                           | Aqp 12L | Antlion                     | <i>Euroleon nostras</i>               | Hexapoda | Neoptera    | Myrmeleontidae |
| GAVV01020125                           | Aqp 12L | Green lacewing              | <i>Pseudomallada prasinus</i>         | Hexapoda | Neoptera    | Chrysopidae    |
| XP_974208                              | Aqp 12L | Red flour Beetle            | <i>Tribolium castaneum</i>            | Hexapoda | Coleoptera  | Tenebrionidae  |
| AQHT01000891/AQHT01000892              | Aqp 12L | Asian longhorned beetle     | <i>Anoplophora glabripennis</i>       | Hexapoda | Coleoptera  | Cerambycidae   |
| GAFI01011142                           | Aqp 12L | Southern pine beetle        | <i>Dendroctonus frontalis</i>         | Hexapoda | Coleoptera  | Curculionidae  |
| APGL01029398                           | Aqp 12L | Mountain pine beetle        | <i>Dendroctonus ponderosae</i>        | Hexapoda | Coleoptera  | Curculionidae  |
| JR469890                               | Aqp 12L | Red palm weevil             | <i>Rhynchophorus ferrugineus</i>      | Hexapoda | Coleoptera  | Curculionidae  |
| GAE001001684                           | Aqp 12L | White pine weevil           | <i>Pissodes strobi</i>                | Hexapoda | Coleoptera  | Curculionidae  |
| AGRHO1000202                           | Aqp 12L | Reticulated beetle          | <i>Priacma serrata</i>                | Hexapoda | Coleoptera  | Cupedidae      |
| XP_003393649                           | Aqp 12L | Buff-tailed bumblebee       | <i>Bombus terrestris</i>              | Hexapoda | Hymenoptera | Apidae         |
| XP_003490105                           | Aqp 12L | Common eastern bumble bee   | <i>Bombus impatiens</i>               | Hexapoda | Hymenoptera | Apidae         |
| XP_001119893                           | Aqp 12L | Honey bee                   | <i>Apis mellifera</i>                 | Hexapoda | Hymenoptera | Apidae         |
| ANOB01024207                           | Aqp 12L | Halictid Bee                | <i>Lasioglossum albipes</i>           | Hexapoda | Hymenoptera | Halictidae     |
| GAGH01010151                           | Aqp 12L | Mason bee                   | <i>Osmia cornuta</i>                  | Hexapoda | Hymenoptera | Megachilidae   |
| AFJA01002269                           | Aqp 12L | Alfalfa leafcutting bee     | <i>Megachile rotundata</i>            | Hexapoda | Hymenoptera | Megachilidae   |

|                                              |             |                                     |                                               |                |                    |                     |
|----------------------------------------------|-------------|-------------------------------------|-----------------------------------------------|----------------|--------------------|---------------------|
| EFN85024                                     | Aqp 12L     | Jerdon's jumping ant                | <i>Harpegnathos saltator</i>                  | Hexapoda       | Hymenoptera        | Formicidae          |
| EFN70241                                     | Aqp 12L     | Florida carpenter ant               | <i>Camponotus floridanus</i>                  | Hexapoda       | Hymenoptera        | Formicidae          |
| ADTU01018182                                 | Aqp 12L     | Leafcutter ant                      | <i>Atta cephalotes</i>                        | Hexapoda       | Hymenoptera        | Formicidae          |
| EGIS7993                                     | Aqp 12L     | Panamanian leafcutter ant           | <i>Acromyrmex echinatior</i>                  | Hexapoda       | Hymenoptera        | Formicidae          |
| FQ836707/FQ840903                            | Aqp 12L     | Parasitoid wasp                     | <i>Asobara tabida</i>                         | Hexapoda       | Hymenoptera        | Braconidae          |
| AOFNO1007317                                 | Aqp 12L     | Coleseed sawfly                     | <i>Athalia rosae</i>                          | Hexapoda       | Hymenoptera        | Tenthredinidae      |
| PHUM127940                                   | Aqp 12L     | Human body louse                    | <i>Pediculus humanus corporis</i>             | Hexapoda       | Phthiraptera       | Pediculidae         |
| ACPB02038779/ACPB02002207                    | Aqp 12L     | Assassin bug                        | <i>Rhodnius prolixus</i>                      | Hexapoda       | Hemiptera          | Reduviidae          |
| KF048101                                     | Aqp 12L     | Lygus bug                           | <i>Lygus hesperus</i>                         | Hexapoda       | Hemiptera          | Miridae             |
| EZ940769/HP803079                            | Aqp 12L     | Sweet potato whitefly               | <i>Bemisia tabaci</i>                         | Hexapoda       | Hemiptera          | Aleyrodidae         |
| HS430594                                     | Aqp 12L     | Brown planthopper                   | <i>Nilaparvata lugens</i>                     | Hexapoda       | Hemiptera          | Delphacidae         |
| GAGF01017370                                 | Aqp 12L     | Green lacewing                      | <i>Chrysopa pallens</i>                       | Hexapoda       | Neoptera           | Chrysopidae         |
| FG130040                                     | Aqp 12L     | American cockroach                  | <i>Periplaneta americana</i>                  | Hexapoda       | Blattodea          | Blattidae           |
| GBID01003279                                 | Aqp 12L     | German cockroach                    | <i>Blattella germanica</i>                    | Hexapoda       | Blattodea          | Ectobiidae          |
| AUST01032598/AUST01032597                    | Aqp 12L     | Nevada dampwood termite             | <i>Zootermopsis nevadensis</i>                | Hexapoda       | Isoptera           | Termitidae          |
| FX376324                                     | Aqp 12L     | Wood-eating higher termite          | <i>Nasutitermes takasagoensis</i>             | Hexapoda       | Isoptera           | Termitidae          |
| GABA01001239                                 | Aqp 12L     | Zoraptid                            | <i>Zorotypus gurneyi</i>                      | Hexapoda       | Zoraptera          | Zorotypidae         |
| GAWEO1136841/GAWEO1162972/GAWEO1022485       | Aqp 12L     | Vietnamese walking stick insect     | <i>Ramulus artemis</i>                        | Hexapoda       | Phasmatodea        | Phasmatidae         |
| GAIZ01025748                                 | Aqp 12L     | Sand field cricket                  | <i>Gryllus firmus</i>                         | Hexapoda       | Orthoptera         | Gryllidae           |
| EH632839                                     | Aqp 12L     | Hawaiian swordtail cricket          | <i>Laupala kohalensis</i>                     | Hexapoda       | Orthoptera         | Gryllidae           |
| CO854318/CO854607                            | Aqp 12L     | Migratory locust                    | <i>Locusta migratoria</i>                     | Hexapoda       | Orthoptera         | Acrididae           |
| GAEQ01010065                                 | Aqp 12L     | Hagen's bluet                       | <i>Enallagma hageni</i>                       | Hexapoda       | Odonata            | Coenagrionidae      |
| APVNO1144267                                 | Aqp 12L     | Scarce chaser                       | <i>Ladona fulva</i>                           | Hexapoda       | Odonata            | Libellulidae        |
| AYNC01076740                                 | Aqp 12L     | Green drake                         | <i>Ephemera danica</i>                        | Hexapoda       | Ephemeroptera      | Ephemeridae         |
| GAMMO1011672                                 | Aqp 12L     | Springtail                          | <i>Ephemerella cincta</i>                     | Hexapoda       | Collembola         | Entomobryidae       |
| GAMNO1009381                                 | Aqp 12L     | Springtail                          | <i>Folsomia candida</i>                       | Hexapoda       | Collembola         | Isotomidae          |
| AFFK01022088                                 | Aqp 12L     | Coastal European centipede          | <i>Strigamia maritima</i>                     | Chilopoda      | Geophilomorpha     | Linotaeniidae       |
| JR223268                                     | Aqp 12L     | Black tiger shrimp                  | <i>Penaeus monodon</i>                        | Malacostraca   | Decapoda           | Penaedidae          |
| JP419814/JP406388                            | Aqp 12L     | Pacific white shrimp                | <i>Litopenaeus vannamei</i>                   | Malacostraca   | Decapoda           | Penaedidae          |
| EX568605                                     | Aqp 12L     | American lobster                    | <i>Homarus americanus</i>                     | Malacostraca   | Decapoda           | Nephropidae         |
| FE773872                                     | Aqp 12L     | Flat porcelain crab                 | <i>Petrolisthes cinctipes</i>                 | Malacostraca   | Decapoda           | Porcellanidae       |
| DN634964                                     | Aqp 12L     | Green shore Crab                    | <i>Carcinus maenas</i>                        | Malacostraca   | Decapoda           | Carcinidae          |
| GAKD01002926                                 | Aqp 12L     | Amphipod                            | <i>Melita plumulosa</i>                       | Malacostraca   | Amphipoda          | Melitidae           |
| ES505590                                     | Aqp 12L     | Brine Shrimp                        | <i>Artemia franciscana</i>                    | Branchiopoda   | Arthropoda         | Artemiidae          |
| EFX67799                                     | Aqp 12L     | Common water flea                   | <i>Daphnia pulex</i>                          | Branchiopoda   | Diplostraca        | Daphniidae          |
| ACO11400                                     | Aqp 12L     | Caligid copepod                     | <i>Caligus rogercresseyi</i>                  | Maxillopoda    | Siphonostomatoida  | Caligidae           |
| ACO14967                                     | Aqp 12L     | Caligid copepod                     | <i>Caligus clemensi</i>                       | Maxillopoda    | Siphonostomatoida  | Caligidae           |
| KR005665                                     | Aqp 12L1    | Salmon louse                        | <i>Lepeophtheirus salmonis</i>                | Maxillopoda    | Siphonostomatoida  | Caligidae           |
| KR005666                                     | Aqp 12L2    | Salmon louse                        | <i>Lepeophtheirus salmonis</i>                | Maxillopoda    | Siphonostomatoida  | Caligidae           |
| GO412603                                     | Aqp 12L     | Cod worm                            | <i>Lernaeocera branchialis</i>                | Maxillopoda    | Siphonostomatoida  | Pennellidae         |
| EH666294                                     | Aqp 12L     | Calanus                             | <i>Calanus finmarchicus</i>                   | Maxillopoda    | Calanoida          | Calanidae           |
| XP_002416580                                 | Aqp 12L     | Blacklegged tick                    | <i>Ixodes scapularis</i>                      | Acari          | Ixodida            | Ixodidae            |
| ADDG01005800                                 | Aqp 12L     | Honeybee mite                       | <i>Varroa destructor</i>                      | Acari          | Mesostigmata       | Varroidae           |
| XP_003740565                                 | Aqp 12L     | Western predatory mite              | <i>Metaseiulus occidentalis</i>               | Acari          | Mesostigmata       | Phytoseiidae        |
| JR698214                                     | Aqp 12L     | Two-spotted spider mite             | <i>Tetranychus urticae</i>                    | Acari          | Acariformes        | Tetranychidae       |
| GANL01000406                                 | Aqp 12L     | Black widow                         | <i>Latrodectus tredecimguttatus</i>           | Arachnida      | Araneae            | Theridiidae         |
| GBCS01016346                                 | Aqp 12L     | Western black widow                 | <i>Latrodectus hesperus</i>                   | Arachnida      | Araneae            | Theridiidae         |
| AOMJ01188201/AOMJ01188200/AOMJ01188199       | Aqp 12L     | Common house spider                 | <i>Parasteatoda tepidariorum</i>              | Arachnida      | Araneae            | Theridiidae         |
| JT033535                                     | Aqp 12L     | Subsocial spider                    | <i>Stegodyphus lineatus</i>                   | Arachnida      | Araneae            | Theridiidae         |
| EY189672                                     | Aqp 12L     | Spider                              | <i>Loxosceles laeta</i>                       | Arachnida      | Araneae            | Sicariidae          |
| GAZS01072938                                 | Aqp 12L     | Brazilian giant whiteknee tarantula | <i>Acanthoscurria geniculata</i>              | Arachnida      | Araneae            | Theraphosidae       |
| AYEL01083560                                 | Aqp 12L     | Chinese scorpion                    | <i>Mesobuthus martensii</i>                   | Arachnida      | Scorpiones         | Buthidae            |
| AXZI01164565/AXZI01164567                    | Aqp 12L     | Baja California bark scorpion       | <i>Centruroides exilicauda</i>                | Arachnida      | Scorpiones         | Buthidae            |
| AEP14565                                     | Aqp 12L(11) | Water bear                          | <i>Milnesium tardigradum</i>                  | Tardigrada     | Apochela           | Milnesiidae         |
| <b>Bacteria AqpZ</b>                         |             |                                     |                                               |                |                    |                     |
| AAC43518/EBESCP00000004569                   | Aqp Z       | Bacteria                            | <i>Escherichia coli</i>                       | Proteobacteria | Enterobacteriales  | Enterobacteriaceae  |
| WP_005067324/EBESCP000000088383              | Aqp Z       | Bacteria                            | <i>Shigella flexneri</i>                      | Proteobacteria | Enterobacteriales  | Enterobacteriaceae  |
| YP_038558/EBBACP000000072619                 | Aqp Z       | Bacteria                            | <i>Bacillus thuringiensis</i>                 | Firmicutes     | Bacillales         | Bacillaceae         |
| YP_002340560/EBBACP000000092199              | Aqp Z       | Bacteria                            | <i>Bacillus cereus</i>                        | Firmicutes     | Bacillales         | Bacillaceae         |
| NP_359196/EBSTRP000000015353                 | Aqp Z       | Bacteria                            | <i>Streptococcus pneumoniae</i>               | Firmicutes     | Lactobacillales    | Streptococcaceae    |
| <b>Bacteria GlpF</b>                         |             |                                     |                                               |                |                    |                     |
| NP_290556/EBESCP000000004421                 | Glp F       | Bacteria                            | <i>Escherichia coli</i>                       | Proteobacteria | Enterobacteriales  | Enterobacteriaceae  |
| WP_000084271/EBESCP000000089272              | Glp F       | Bacteria                            | <i>Shigella flexneri</i>                      | Proteobacteria | Enterobacteriales  | Enterobacteriaceae  |
| YP_405253/EBESCP000000079777                 | Glp F       | Bacteria                            | <i>Shigella dysenteriae</i>                   | Proteobacteria | Enterobacteriales  | Enterobacteriaceae  |
| YP_003615521                                 | Glp F       | Bacteria                            | <i>Enterobacter cloacae subsp.</i>            | Proteobacteria | Enterobacteriales  | Enterobacteriaceae  |
| WP_010299311                                 | Glp F       | Bacteria                            | <i>Pectobacterium carotovorum</i>             | Proteobacteria | Enterobacteriales  | Enterobacteriaceae  |
| NP_977447/EBBACP000000096005                 | Glp F       | Bacteria                            | <i>Bacillus cereus</i>                        | Firmicutes     | Bacillales         | Bacillaceae         |
| YP_035285/EBBACP000000073529                 | Glp F       | Bacteria                            | <i>Bacillus thuringiensis</i>                 | Firmicutes     | Bacillales         | Bacillaceae         |
| NP_388809/EBBACP00000003509                  | Glp F       | Bacteria                            | <i>Bacillus subtilis subsp.</i>               | Firmicutes     | Bacillales         | Bacillaceae         |
| NP_359579/EBSTRP000000014534                 | Glp F3      | Bacteria                            | <i>Streptococcus pneumoniae</i>               | Firmicutes     | Lactobacillales    | Streptococcaceae    |
| <b>Hexapod bacteroid (endosymbiont) GlpF</b> |             |                                     |                                               |                |                    |                     |
| XM_004532995                                 | Glp F       | Mediterranean fruit fly             | <i>Ceratitis capitata</i>                     | Hexapoda       | Diptera            | Tephritidae         |
| ACPB02009318                                 | Glp F       | Assassin bug                        | <i>Rhodnius prolixus</i>                      | Hexapoda       | Hemiptera          | Reduviidae          |
| <b>Archaea AqpM</b>                          |             |                                     |                                               |                |                    |                     |
| AB055880                                     | Aqp M       | Archaea                             | <i>Methanothermobacter thermautotrophicus</i> | Euryarchaeota  | Methanobacteriales | Methanobacteriaceae |
| NP_988083                                    | Aqp M       | Archaea                             | <i>Methanococcus marisaludis</i>              | Euryarchaeota  | Methanococcales    | Methanococcaceae    |
| YP_003435795                                 | Aqp M       | Archaea                             | <i>Ferroglobus placidus</i>                   | Euryarchaeota  | Archaeoglobales    | Archaeoglobaceae    |
| YP_843562                                    | Aqp M       | Archaea                             | <i>Methanosaeta thermophila</i>               | Euryarchaeota  | Methanosarcinales  | Methanosaeetaceae   |
| YP_305556                                    | Aqp M       | Archaea                             | <i>Methanosarcina barkeri</i>                 | Euryarchaeota  | Methanosarcinales  | Methanosarcinaceae  |
